1 **Title:** “Real-time county-aggregated wastewater-based estimates for SARS-CoV-2 effective reproduction numbers”

2 **Authors:** Sindhu Ravuri<sup>§1</sup>, Elisabeth Burnor<sup>1</sup>, Isobel Routledge<sup>1</sup>, Natalie Linton<sup>1</sup>, Mugdha Thakur<sup>1</sup>, Alexandria  
3 Boehm<sup>2</sup>, Marlene Wolfe<sup>3</sup>, Heather N. Bischel<sup>4</sup>, Colleen C. Naughton<sup>5</sup>, Alexander T. Yu<sup>1</sup>, Lauren A. White<sup>1</sup> &  
4 Tomás M. León<sup>1</sup>

5  
6 <sup>§</sup>Corresponding author

7  
8 **Affiliations:**

9  
10 <sup>1</sup> California Department of Public Health Center for Infectious Diseases, Richmond and Sacramento, CA, USA

11 <sup>2</sup> Department of Civil and Environmental Engineering, Stanford University, California, USA

12 <sup>3</sup> Rollins School of Public Health, Emory University, Atlanta, Georgia, USA

13 <sup>4</sup> Department of Civil and Environmental Engineering, University of California Davis, Davis, CA, USA

14 <sup>5</sup> Department of Civil and Environmental Engineering, University of California Merced, Merced, CA, USA

15  
16 **Complete contact information for the corresponding author (name, email address, and postal address):**

17 Sindhu Ravuri; [sindhu.ravuri@cdph.ca.gov](mailto:sindhu.ravuri@cdph.ca.gov); 850 Marina Bay Pkwy, Building P, Richmond, CA 94804, USA

18  
19 **Declaration of conflicts of interest:**

20 The authors declare they have no conflicts of interest related to this work to disclose.

21  
22 **ABSTRACT**

23 *Background:* The effective reproduction number ( $R_e$ ) serves as a metric of population-wide, time-varying disease  
24 spread. During the COVID-19 pandemic,  $R_e$  was primarily estimated from clinical surveillance data streams ( $R_{cc}$ ),  
25 which have varied in quality and representativeness due to changes in testing volume, test-seeking behavior, and  
26 resource constraints. Deriving  $R_e$  from alternative data sources such as wastewater could inform future public health  
27 responses.

28  
29 *Objectives:* We estimated county-aggregated, sewershed-restricted wastewater-based SARS-CoV-2  $R_e$  ( $R_{ww}$ ) from  
30 May 1, 2022 to April 30, 2023 for five counties in California of varying population sizes, clinical testing rates,  
31 demographics, proportions surveilled by wastewater, and sampling frequencies to validate the reliability of  $R_{ww}$  as a  
32 real-time disease surveillance metric.

33  
34 *Methods:* We produced both instantaneous and cohort sewershed-restricted  $R_e$  using smoothed and deconvolved  
35 wastewater concentrations. We then population-weighted and aggregated these sewershed-level estimates to arrive  
36 at county-level  $R_e$ . Using mean absolute error (MAE), Spearman’s rank correlation ( $\rho$ ), confusion matrix  
37 classification, and cross-correlation analyses, we compared the timing and trajectory of two  $R_{ww}$  models to: (1) a  
38 publicly available, county-level ensemble of  $R_{cc}$  estimates, and (2) a county-aggregated, sewershed-restricted  $R_{cc}$ .

39  
40 *Results:* Both  $R_{ww}$  models demonstrated high concordance with traditional  $R_{cc}$  estimates, as indicated by low mean  
41 absolute errors ( $MAE \leq 0.09$ ), significant positive Spearman correlation (Spearman  $\rho \geq 0.66$ ,  $p < 0.001$ ), and high  
42 confusion matrix classification accuracy ( $\geq 0.81$ ). The relative timings of  $R_{ww}$  and  $R_{cc}$  were less clear, with cross-  
43 correlation analyses suggesting strong associations for a wide range of temporal lags that varied by county and  $R_{ww}$   
44 model type.

45  
46 *Discussion:* This  $R_e$  estimation methodology provides a generalizable, robust, and operationalizable framework for  
47 estimating county-level  $R_{ww}$ . Our results support the additional use of  $R_{ww}$  as an epidemiological tool for  
48 surveillance. Based on this research, we produced publicly available  $R_{ww}$  nowcasts for the California Communicable  
49 diseases Assessment Tool (<https://calcat.covid19.ca.gov/cacovidmodels/>).

50

## 51 INTRODUCTION

52  
53 The effective reproduction number ( $R_e$ ) of a disease represents the average number of secondary infections caused  
54 by a newly infectious individual within a population of both susceptible and immune hosts.<sup>1</sup> An  $R_e$  value greater than  
55 one suggests the number of new infections within a population will increase, while an  $R_e$  value less than one  
56 indicates the number of new infections will decrease.<sup>2</sup> In the context of SARS-CoV-2,  $R_e$  commonly serves as a  
57 metric of population-wide disease spread under conditions of time-varying vaccination rates, immunity viral variant  
58 evolution, health protective behavior modifications, and other response measures.<sup>2</sup> Importantly, monitoring  $R_e$  can  
59 inform public health policy decisions (e.g., travel restrictions, school closures, mask requirements).<sup>3-6</sup>

60  
61 In the first years of the COVID-19 pandemic,  $R_e$  was estimated from clinical surveillance data streams such as  
62 confirmed case counts (i.e., “case-based”  $R_e$ ). However, the quality and representativeness of clinical data are not  
63 always consistent through time and space. Ongoing changes in testing capacity, access, eligibility, test-seeking  
64 behavior and reporting may bias case-based  $R_e$  estimates; for example, a simulation study mimicking alterations to  
65 testing practices found that increasing or decreasing the proportion of detected cases over- or under-estimated  $R_e$ ,  
66 respectively.<sup>7</sup> Delays and administrative noise in case reporting (e.g., lagged processing speed for weekend data) are  
67 also common issues for traditional  $R_e$  estimation tools.<sup>8</sup> Deriving  $R_e$  from alternative data sources will be an  
68 important means of informing response to the future public health impact of COVID-19 and bolstering nowcasting  
69 efforts.

70  
71 The COVID-19 pandemic highlighted wastewater surveillance as a timely and accurate monitoring tool reflecting  
72 community-wide disease transmission.<sup>9,10</sup> Wastewater surveillance measures the amount of SARS-CoV-2 viral RNA  
73 shed into wastewater by infected individuals. It circumvents limitations of traditional clinical SARS-CoV-2  
74 surveillance in important ways. First, it captures both asymptomatic and symptomatic infections.<sup>11</sup> Second,  
75 wastewater surveillance is not as impacted by heterogeneous, time- and space-varying testing-related factors.<sup>12-16</sup>  
76 Third, wastewater surveillance data is usually available within days, overcoming case reporting delays.<sup>12-16</sup> For  
77 these reasons, using wastewater surveillance could improve the accuracy and reliability of  $R_e$  estimates while also  
78 compensating for data delays from traditional sources. In addition, given that wastewater surveillance measures viral  
79 RNA concentrations at the level of a single wastewater treatment plant’s catchment area (sewershed), it could be  
80 used to estimate real-time  $R_e$  in finite geographies that may lack robust case reporting.

81  
82 Existing methods of wastewater-based  $R_e$  (denoted as  $R_{ww}$  in this study, following notation by Huisman et al.<sup>17</sup>)  
83 estimation include SEIR-like compartmental models,<sup>18</sup> branching process-inspired models,<sup>17,19,20</sup> and artificial neural  
84 networks.<sup>21</sup> Despite using different underlying mathematical approaches, these methods have consistently revealed  
85 high concordance between  $R_{ww}$  and conventional case-based  $R_e$  estimates (denoted as  $R_{cc}$  in this study, following  
86 notation by Huisman et al.<sup>17</sup>). In some circumstances,  $R_{ww}$  even highlights outbreak dynamics not captured by  $R_{cc}$   
87 alone; for example, Nadeau et al.<sup>20</sup> demonstrated that, compared to  $R_{cc}$ ,  $R_{ww}$  better reflected the impact of COVID-19  
88 interventions on influenza transmission. Notably, these studies have typically examined  $R_{ww}$  at the scale of an  
89 individual sewershed. However, a single county may contain multiple treatment plants representing distinct  
90 communities, and sewersheds do not typically map to municipal boundaries. Moreover, public health policies are  
91 often enacted on a county or regional level. Deriving county-level  $R_{ww}$  estimates that integrate data from multiple  
92 sewersheds would therefore provide a more comprehensive view of community transmission dynamics at a  
93 geographic scale relevant for public health policymaking.

94  
95 In this study, we provide proof-of-concept estimation of county-aggregated, sewershed-restricted  $R_{ww}$  for the state of  
96 California from May 1, 2022 to April 30, 2023. We compare the timing and trajectory of two  $R_{ww}$  models to: (1) a  
97 publicly available, county-level ensemble of  $R_{cc}$  estimates, and (2) a county-aggregated, sewershed-restricted  $R_{cc}$  for  
98 SARS-CoV-2 (though it is important to note that  $R_{ww}$  and  $R_{cc}$  are both measuring an unobservable quantity,  $R_e$ , the  
99 “true” underlying parameter). To evaluate generalizability of our estimation procedure across distinct populations,  
100 we present results for five counties with varying sizes, clinical testing rates, demographics, proportions surveilled by  
101 wastewater, and sampling frequencies.

102

## 103 METHODS

### 104 *R<sub>e</sub> Estimation Overall Approach*

105  
106 To produce  $R_{ww}$  estimates, we relied on the  $R_e$  derivation frameworks developed by Cori et al.<sup>1</sup> and Wallinga &  
107 Teunis<sup>22</sup> (hereafter denoted as instantaneous or cohort  $R_e$ , respectively). These two modeling approaches,  
108 traditionally applied on case data, have been well characterized and broadly used in public health for real-time  $R_{cc}$   
109 estimation.<sup>8</sup>

110  
111 We compared the timing and trajectory of these two  $R_{ww}$  models to the following: (1) county-level  $R_{cc}$  ensembles  
112 sourced from the California Communicable diseases Assessment Tool, CalCAT  
113 (<https://calcat.covid19.ca.gov/cacovidmodels/>) (hereafter denoted as the CalCAT ensemble); and (2)  $R_{cc}$  estimates  
114 produced by applying Cori et al.<sup>1</sup> and Wallinga & Teunis<sup>22</sup> to sewershed-restricted case data (hereafter denoted as  
115 sewershed-restricted  $R_{cc}$ ). Comparing  $R_{ww}$  results to the CalCAT ensemble allows us to validate the robustness and  
116 reliability of  $R_{ww}$  as a real-time disease surveillance metric for public health. Additionally, comparing  $R_{ww}$  results to  
117 sewershed-restricted  $R_{cc}$  offers two potential advantages. First, sewershed-restricted  $R_{cc}$  represents the same  
118 populations within a given county as  $R_{ww}$ , while the CalCAT ensemble relies on county-wide data sources. Second,  
119 sewershed-restricted  $R_{cc}$  can be indexed by time of infection. In contrast, the CalCAT ensemble integrates different  
120 models with varying  $R_e$  estimation procedures, meaning its estimates cannot be easily indexed by time of infection.  
121 Therefore, comparing  $R_{ww}$  and sewershed-restricted  $R_{cc}$  allows us to contextualize the former's timing with respect  
122 to conventional case-based approaches.

123  
124 We first conducted our  $R_{ww}$  estimation process using wastewater data. We subsequently repeated the estimation  
125 procedure on sewershed-restricted case data to produce  $R_{cc}$  (Figure 2). County-level CalCAT ensemble estimates are  
126 publicly available and were not further processed. Our analysis period spanned one year (May 1, 2022 to April 30,  
127 2023).

### 128 *R<sub>e</sub> Estimation Process*

## 129 **STEP 0: Raw Data Sources**

### 130 **Wastewater Sampling**

131  
132  
133 Wastewater samples included in the study were collected during the analysis period using two different methods of  
134 sample processing, as described below (Table 1). Samples were collected from 14 sewersheds in five California  
135 counties at a frequency of three to seven times per week (Table 1). Samples from eight sites (San Francisco  
136 Southeast, San Francisco Oceanside, Sacramento, Palo Alto, San Jose, Sunnyvale, Gilroy/Morgan Hill, and Davis)  
137 were processed according to Method 1. Samples from six sites (Modesto, Merced, Turlock, Esparto, Winters, and  
138 Woodland) were processed according to Method 2 from May 1, 2022 to November 30, 2022 and according to  
139 Method 1 from December 1, 2022 until April 30, 2023 (Tables 1 and S1). Method 2 was designed to closely follow  
140 the protocol of Method 1, with sample processing and laboratory analyses performed at a different laboratory.

### 141 Method 1, Sample Processing

142  
143  
144 Protocols developed for Method 1 were designed and reported according to the Environmental Microbiology  
145 Minimum Information (EMMI) guidelines, as described in Borchardt et al.<sup>23</sup> For samples processed via Method 1,  
146 50 milliliters of wastewater settled solids were collected three to seven times per week from the primary clarifier or  
147 from influent using an Imhoff cone,<sup>24,25</sup> transferred at 4°C and processed immediately upon receipt at the lab. The  
148 methods used to measure the N gene via digital droplet RT-PCR, including thorough descriptions of the extraction  
149 and PCR negative and positive controls, process control recovery, QA/QC elements, thresholding methods, and  
150 relevant EMMI guideline reporting, have been described in detail in the Supplemental Materials and in a previously  
151 published data descriptor.<sup>26</sup>

152  
153  
154 Briefly, wastewater settled solids were dewatered with centrifugation and added to DNA/RNA Shield (Zymo  
155 Research Corporation, Irvine, CA) at a concentration of 75 mg/ml to minimize inhibition. Nucleic acids were

157 extracted and quantified by a digital droplet RT-PCR assay (dd-RT-PCR) targeting the N gene of SARS-CoV-2.<sup>26</sup>  
158 More detailed methods can be found in the Supplemental Materials.

## 159 Method 2. Sample Processing

161  
162 For samples processed via Method 2, the collection procedure of wastewater solids varied by site (Table 1). For  
163 Modesto, grab samples of settled solids from a primary clarifier were collected (similar to Method 1). For Esparto,  
164 Turlock, and Woodland, composite samples of influent wastewater were collected, and for Winters, composite  
165 samples of raw wastewater were collected from a pump station (Table 1). For sites collecting liquid wastewater  
166 samples, solids were obtained by settling the samples in a glass beaker for a minimum of 30 minutes. These settled  
167 solids were then processed according to the same protocol described for primary settled solids.<sup>27</sup> For all sites,  
168 samples were collected three to five times per week and transferred at 4°C to the laboratory. Settled solids were  
169 dewatered, diluted in DNA/RNA Shield (Zymo Research Corporation, Irvine, CA), extracted, and quantified by dd-  
170 RT-PCR. Minor differences in the processing of dewatered solids, extraction, and dd-RT-PCR assays between  
171 Methods 1 and 2 are described in Kadonsky et al.<sup>27</sup> A comparative interlaboratory analysis of wastewater samples  
172 collected from sewersheds in Davis city of Yolo county suggests that data obtained using Methods 1 and 2 are  
173 comparable.<sup>27</sup>

174  
175 In this analysis, we used raw, unadjusted wastewater data in units of copies of SARS-CoV-2 RNA per gram of  
176 wastewater solids.

## 177 **County Selection**

178 For this analysis, we estimated  $R_{ww}$  for five California counties: Sacramento, San Francisco, Santa Clara, Stanislaus,  
179 and Yolo. We selected counties using similar laboratory methodologies that have one or more site(s) with long  
180 wastewater sampling histories (multiple years of available data). Inter-method comparisons of wastewater-derived  
181 SARS-CoV-2 concentrations can be highly complex, as quantification is dependent on several unique features of a  
182 processing pipeline (e.g., sample type (liquid vs. solids), extraction method and efficiency, assay target selection,  
183 quantity of extraction replicates and PCR replicates, laboratory equipment, etc.<sup>28</sup> Although six of our sites  
184 underwent laboratory changes and all sites underwent minor changes in methodology during the study period, we  
185 sought to avoid some of the complications of inter-method data comparability by including only sites processing  
186 settled solids (either grab samples from a primary clarifier or solids settled out from a composite wastewater sample)  
187 and only sites using the same assay target for SARS-CoV-2 (see Supplemental Methods).

188 Wastewater monitoring tends to be more robust in urban locations for reasons such as larger population coverage,  
189 proximity to laboratories, and greater plant staffing and resources, resulting in inequitable coverage for rural  
190 communities.<sup>29</sup> Therefore, we included counties from both urban (San Francisco, Palo Alto, and Sacramento) and  
191 rural areas (Stanislaus and Yolo) (Figures 1 and S1).

192 We define “coverage” as the proportion of a county’s population that resides within sewersheds that are monitored  
193 with wastewater surveillance. Amongst California counties, coverage varies widely, ranging from as low as 10% to  
194 as high as 100%.  $R_{ww}$  estimates produced for counties with low coverage may be subject to selection bias, as they  
195 only account for infections in small subpopulations of the county that are sampled via wastewater monitoring  
196 programs. Such  $R_{ww}$  estimates may consequently follow a trajectory that does not accurately reflect county-wide  
197 infection and transmission dynamics. Due to this concern, we chose counties with at least 50% coverage.

## 198 **Sewershed-Restricted Case Data**

199  
200 Sewershed shapefiles were generated in collaboration with each of the wastewater treatment plants selected for this  
201 analysis. PCR-confirmed COVID-19 case counts reported to the California Department of Public Health (CDPH)  
202 were linked with each sewershed using methods described previously.<sup>30</sup> Cases were counted as a function of episode  
203 date (earliest of date received, date of diagnosis, date of symptom onset, date of death, or date of specimen  
204 collection). The California Health and Human Services (CHHS) Committee for the Protection of Human Subjects  
205 (CPHS) determined that use of this data is exempt from review under their criteria.

## 206 **CalCAT Ensemble**

207  
208

209 As part of the COVID-19 Response, CDPH developed a  $R_e$  nowcast ensemble publicly available on CalCAT  
210 (<https://calcat.covid19.ca.gov/cacovidmodels/>). This nowcast is a smoothed median ensemble of both internally  
211 generated and externally contributed models. Median ensembles tend to outperform individual models, as has been  
212 demonstrated during the COVID-19 pandemic.<sup>31,32</sup> Smoothing ensures that the ensemble is robust to outliers,  
213 dampening noise in the median nowcast. The models are predominantly case-based, though some additionally or  
214 instead use test positivity, hospitalizations, intensive care unit census, and/or deaths as an input (Table S2).

215  
216 The CalCAT ensemble is produced on county, region, and state levels. In this study, we strictly use county-level  
217 CalCAT ensemble estimates. The ensemble is retroactively updated for the dates through the present day, based on  
218 latest estimates from contributing models. The number and cadence of daily contributor models to the ensemble may  
219 vary across time and geographies.

220  
221 The CalCAT ensemble continues to serve as a real-time disease dynamics monitoring tool informing state  
222 policymakers on the speed and strength of SARS-CoV-2 transmission and burden.

### 223 224 **STEP 1: Data transformation**

225  
226 Input time series data streams for sewershed-level  $R_e$  estimation (i.e., case counts and wastewater viral  
227 concentrations) were transformed using distinct approaches to minimize noisiness for each data stream (Figure 2).  
228 Case counts were LOESS smoothed using the R package estimateR. Raw wastewater concentrations were spline  
229 smoothed using the R package npreg.<sup>33</sup> To fit sewershed-specific smoothing splines, we spaced knots by seven days  
230 over the course of the full analysis period. We selected optimal smoothing parameters unique to each sewershed  
231 using ordinary cross validation. Smoothed wastewater concentrations were subsequently square root-transformed.  
232 Root transformation produced  $R_{ww}$  estimates that were more comparable in absolute terms to  $R_{cc}$ , as raw wastewater  
233 concentrations (which can be as high as  $10^6$  copies/gram) are often much greater in magnitude and variability than  
234 traditional case counts.

### 235 236 **STEP 2: Produce sewershed-level $R_e$**

237  
238 Both instantaneous and cohort  $R_e$  models required a time series input of incidence data indexed by date of infection  
239 as well as an estimate of the generation time (i.e., the time interval between infections of an infector and their  
240 infectee(s)).<sup>1,34</sup> Sewershed-restricted case counts were indexed by episode date, while wastewater concentrations  
241 were indexed by date of shedding into wastewater. We re-indexed these data streams to date of infection using  
242 deconvolution with input-specific delay distributions. For case data, we derived a delay distribution using the  
243 California COVID-19 case registry. As is typical of observational line list data, date of infection was unknown, and  
244 date of symptom onset was not available for many cases, in large part due to the presence of mild or asymptomatic  
245 infections and reporting practices. Since episode date in the line list was most representative of the date of nucleic  
246 acid amplification test (NAAT) result, we approximated episode date as the date of NAAT result. Next, we  
247 deconvolved from date of NAAT result to date of infection using two delay distributions: (1) an estimate of the  
248 incubation period, based on Aguila-Mejia et al.,<sup>35</sup> and (2) the delay from symptom onset to NAAT result, based on  
249 the line list (Table 2). For wastewater, we used the infection to shedding distribution reported by Huisman et al.  
250 (Table 2).<sup>17</sup> This distribution was optimized for San Jose, California, and reflects the profile of SARS-CoV-2 RNA  
251 viral shedding by an infected individual during the days post-infection. We used the R package estimateR to perform  
252 deconvolution through a variant of the Richardson-Lucy expectation-maximization algorithm.<sup>36</sup>

253  
254 We also used the estimateR package to produce  $R_e$  values derived from the Cori et al.<sup>1</sup> method (hereon referred to as  
255 instantaneous  $R_{ww}$ ). estimateR implements a wrapper around the Cori et al.<sup>1</sup> approach and enables repeated  $R_e$   
256 estimation on a user-defined number of bootstrap samples built from the input data time series.<sup>36</sup> The distribution of  
257 bootstrapped  $R_e$  estimates is then used to produce 95% confidence intervals.<sup>36</sup> We generated 1000 bootstrap samples  
258 for our study for each location estimate. To produce  $R_e$  values derived from the Wallinga and Teunis method  
259 (hereon referred to as cohort  $R_{ww}$ ), we used the R package R0.<sup>37</sup> We applied an adjustment for right-censorship to  
260 obtain accurate  $R_e$  estimates at the end of the time series.<sup>34,38</sup> With the R0 package, we ran 1000 multinomial  
261 simulations at each time step to compute 95% confidence intervals.<sup>37</sup> Both the instantaneous and cohort models  
262 exhibit noise in initial  $R_e$  estimates (i.e., extreme spikes). To account for this, we trimmed the first week of estimates  
263 for each sewershed-level  $R_e$ . For both models, we utilized the generation time reported by Manica et al. (Table 2).<sup>39</sup>

264

### 265 **STEP 3: Produce county-level $R_e$ via population weighting**

266  
267 Sewershed-restricted  $R_{ww}$  and  $R_{cc}$  estimates were weighted by population and subsequently aggregated to produce  
268 county-level  $R_e$ . The aggregation approach is described in Equation [1], where  $R_{ww,i}$  represents  $R_{ww}$  of sewershed  $i$ ,  
269  $Pop_i$  represents the population size serviced by sewershed  $i$ , and  $n$  represents the total number of sewersheds  
270 enrolled in wastewater monitoring within the relevant county. This aggregation approach ensures sewersheds  
271 corresponding to larger or smaller populations have proportional influence on and representation in the county-level  
272  $R_{ww}$  estimate.  
273

$$274 \text{ County-level } R_e = \frac{\sum_{i=1}^n (R_{ww,i} \times Pop_i)}{\sum_{i=1}^n (Pop_i)} \quad [1]$$

275  
276 Sewershed population sizes should be considered approximate, as they are estimated by wastewater utilities using  
277 unique and non-standardized methodologies.  
278

279 For Yolo county's  $R_{cc}$ , we modified our aggregation approach to accommodate low case counts in sewershed-  
280 restricted boundaries. The minimum number of cumulative infections prior to  $R_e$  estimation recommended by Cori et  
281 al. is 12.<sup>1,36</sup> In certain Yolo sites (Esparto and Winters), the minimum number of cumulative infections prior to  $R_e$   
282 estimation on May 1, 2022 (the analysis period start date) was below this threshold. Such low input case counts  
283 generated unreliable  $R_{cc}$  estimates with extreme sensitivity to small shifts in case incidence. To address this, we  
284 combined case counts across all Yolo sites and input this single time series into our  $R_e$  estimation procedure.  
285

286 Only sewersheds with wastewater data available for a given date were included in the county-aggregated  $R_e$  estimate  
287 for that date. While most sewersheds in our analysis sampled wastewater for the full study period, San Francisco  
288 Southeast began sampling on May 20, 2022. As a result, county-aggregated  $R_{ww}$  for San Francisco only includes San  
289 Francisco Oceanside for the first 19 days of the study period.  
290

291 We derived confidence intervals for county-level  $R_{ww}$  and  $R_{cc}$  as population-weighted ensembles of sewershed-level  
292 confidence intervals. For each date, we assumed that a sewershed's  $R_e$  ( $R_{ww}$  or  $R_{cc}$ ) point estimate served as the mean  
293 of a normal (or Gaussian) distribution with 95% confidence intervals matching those estimated for each sewershed.  
294 Under this simplifying assumption, we then linearly interpolated the means and variances of sewershed-level normal  
295 distributions within a county to produce a combined normal distribution; confidence intervals of this resultant  
296 distribution were used for county-level  $R_{ww}$  and  $R_{cc}$ . This method of linear interpolation of Gaussian distributions has  
297 been shown to reduce the error coverage for ensemble estimates.<sup>40,41</sup> Uncertainty estimation for the CalCAT  
298 ensemble was not feasible, as contributing models did not all report confidence intervals.  
299

#### 300 *Comparison of $R_e$ trajectories*

301  
302 To evaluate  $R_{ww}$  and  $R_{cc}$  concordance in magnitude and direction, we calculated the mean absolute error (MAE) and  
303 Spearman's rank correlation ( $\rho$ ). For  $R_{ww}$  versus sewershed-restricted  $R_{cc}$ , identical  $R_e$  models (instantaneous or  
304 cohort) were compared.  
305

306 CalCAT ensemble values provide real-time, ongoing  $R_{cc}$  estimates with relevance for statewide public health  
307 response, while sewershed-restricted  $R_{cc}$  values provide comparative controls for our particular study. Additional  
308 analyses characterizing the directional concordance between  $R_{ww}$  and the CalCAT ensemble would provide greater  
309 evidence of the former's potential real-time public health utility. To that end, we produced multi-class confusion  
310 matrices relating  $R_{ww}$  to the CalCAT ensemble. Based on magnitude,  $R_e$  values were grouped into transmission  
311 strength categories for the state of California (<0.7, 0.7-0.9, 0.9-1.1, 1.1-1.3, >1.3, which represent a sharp decrease,  
312 decrease, stability, increase, and sharp increase in  $R_e$ , respectively). When predicted  $R_{ww}$  values and reference  
313 CalCAT ensemble values belong to the same category, the confusion matrix marks it an instance of agreement (in  
314 this context, CalCAT ensemble values are treated as the source of truth, or actuals). The total frequency of  
315 agreement instances for each  $R_e$  category are then visualized by the confusion matrix.  
316

317 We reported the resulting sensitivity, specificity, positive predictive values (PPV), and negative predictive values  
318 (NPV) for each  $R_e$  category. Sensitivity and specificity reflected the fraction of CalCAT ensemble observations

319 which were correctly classified by  $R_{ww}$  for each  $R_e$  category. PPV and NPV reflected the proportion of matching and  
320 non-matching classifications for  $R_{ww}$  predictions for each  $R_e$  category. Here, for a given  $R_e$  category, “true positives”  
321 indicate reference observations correctly classified by  $R_{ww}$  as belonging to the category, and “true negatives” indicate  
322 reference observations correctly classified by  $R_{ww}$  as not belonging to the category. We also reported the overall  
323 accuracy, which summarizes across all  $R_e$  categories. The overall accuracy sums the number of  $R_e$  predictions  
324 correctly classified by  $R_{ww}$  and divides that sum by the total number of observations in the time series. These five  
325 metrics do not include the categories  $R_e < 0.7$  and  $R_e > 1.3$  as they had no values during the study period.

326  
327 We used the R package caret to generate all confusion matrices and corresponding performance metrics.<sup>42</sup>

328  
329 *Comparison of  $R_e$  temporalities*

330  
331 We performed cross-correlation between  $R_{ww}$  and  $R_{cc}$  to identify temporal lags in the former that may be useful  
332 predictors of the latter. Cross-correlations were performed for a lag value range of -20 to 20 days (negative lag  
333 values:  $R_{ww}$  temporally precedes  $R_{cc}$ ; positive lag values:  $R_{cc}$  temporally precedes  $R_{ww}$ ; lag value of zero:  $R_{ww}$  is not  
334 temporally shifted with respect to  $R_{cc}$ ).

## 335 RESULTS

336  
337 We produced two SARS-CoV-2  $R_{ww}$  models for five California counties. We then compared the timing, magnitude,  
338 and directionality of  $R_{ww}$  to the CalCAT ensemble and sewershed-restricted  $R_{cc}$ . All results for San Francisco, Santa  
339 Clara, and Yolo counties are included in the main text; numerical results for Sacramento and Stanislaus counties are  
340 included in the main text and graphical results are in the Supplemental Material.

### 341 *Comparison of $R_e$ trajectories*

342  
343  $R_{ww}$  tracks closely with  $R_{cc}$  over time and geography (Figures 3, S2, and S4). Quantitatively, we found high  
344 correspondence between  $R_{ww}$  and  $R_{cc}$  trajectories for all counties across three analyses: mean absolute error (MAE),  
345 Spearman's rank correlation, and confusion matrix classification.

### 347 **Mean Absolute Error Analysis**

348 When compared against  $R_{cc}$  for the entire analysis period,  $R_{ww}$  had a low average MAE ( $MAE \leq 0.09$ , Table 3). For  
349 both instantaneous and cohort  $R_{ww}$  models, MAE values relating  $R_{ww}$  to CalCAT ensemble estimates were lower  
350 ( $MAE \leq 0.07$ ) than MAE values relating  $R_{ww}$  to sewershed-restricted  $R_{cc}$  estimates ( $MAE \leq 0.09$ ). MAE values  
351 relating  $R_{ww}$  to CalCAT ensemble estimates were lower for instantaneous  $R_{ww}$  ( $MAE \leq .05$ ), while MAE values  
352 relating  $R_{ww}$  to sewershed-restricted  $R_{cc}$  estimates were lower for cohort  $R_{ww}$  ( $MAE \leq 0.06$ ). These results were  
353 consistent across all five counties.

354  
355 **Spearman's Rank Correlation Analysis**  
356 Over the entire analysis period,  $R_{ww}$  estimates were strongly, positively, and significantly correlated with  $R_{cc}$   
357 estimates for all five counties (Spearman  $\rho \geq 0.62$ ,  $p < 0.001$ ) (Table 3). For instantaneous  $R_{ww}$ , strength of  
358 correlation between  $R_{ww}$  and CalCAT ensemble estimates was higher (Spearman  $\rho \geq 0.78$ ,  $p < 0.001$ ) than the  
359 strength of correlation between  $R_{ww}$  and sewershed-restricted  $R_{cc}$  estimates (Spearman  $\rho \geq 0.66$ ,  $p < 0.001$ ) in four of  
360 five counties. For cohort  $R_{ww}$ , strength of correlation between  $R_{ww}$  and the CalCAT ensemble (Spearman  $\rho \geq 0.62$ ,  $p$   
361  $< 0.001$ ) did not show a clear pattern in relation to the strength of correlation between  $R_{ww}$  and sewershed-restricted  
362  $R_{cc}$  estimates (Spearman  $\rho \geq 0.66$ ,  $p < 0.001$ ). Strength of correlation between  $R_{ww}$  and the CalCAT ensemble  
363 estimates was higher across all counties for the instantaneous  $R_{ww}$  model (Spearman  $\rho \geq 0.78$ ,  $p < 0.001$ ). The  
364 strength of correlation between  $R_{ww}$  and sewershed-restricted  $R_{cc}$  estimates was generally higher for the cohort  $R_{ww}$   
365 approach (Spearman  $\rho \geq 0.62$ ,  $p < 0.001$ ), with the exceptions of Sacramento and Yolo counties (for which  
366 instantaneous  $R_{ww}$  demonstrated slightly higher strength of correlation).

### 368 **Confusion Matrix Analysis**

369 We performed confusion matrix classification analysis, stratified by county and  $R_{ww}$  modeling approach, to further  
370 characterize the directional concordance between  $R_{ww}$  and the CalCAT ensemble (Figures 4 and S3).

371  
372 The overall classification accuracy of both  $R_{ww}$  models was consistently high ( $\geq 0.79$ ) across all counties; the sole  
373 exception to this pattern was Stanislaus, which had a slightly lower overall accuracy for its  $R_{ww}$  models ( $\geq 0.64$ )  
374 (Tables 4 and 5). Overall accuracy for the cohort  $R_{ww}$  model was lower as compared to instantaneous  $R_{ww}$  for all  
375 counties. For all counties and  $R_{ww}$  approaches, the total frequency of agreement instances was greatest for the 0.9 to  
376 1.1  $R_e$  (stable) range (Figures 4 and S3).

377  
378 Across all counties, both  $R_{ww}$  models generally demonstrated the greatest sensitivity and PPV for  $R_e$  estimates with  
379 magnitudes between 0.9 and 1.1 (sensitivity = 0.78-0.99 and 0.70-0.99; PPV = 0.89-0.97 and 0.77-0.95 for  
380 instantaneous and cohort, respectively). For all  $R_e$  classifications, sensitivity and PPV varied by geography and  $R_{ww}$   
381 model type. Interestingly, for  $R_e$  estimates between 0.7 and 0.9, the PPV of cohort  $R_{ww}$  was incalculable (San  
382 Francisco and Yolo) or 0 (Sacramento and Santa Clara) for all counties except Stanislaus (PPV = 0.48). An  
383 incalculable PPV indicates there were no  $R_{ww}$  predictions within this range; a PPV of 0 indicates  $R_{ww}$  never estimated  
384  $R_e$  between 0.7 and 0.9 when the CalCAT ensemble did. However, it is important to caveat that there were few ( $<$   
385 20) eligible observations in this category for all counties except Stanislaus.

386  
387 For  $R_e$  estimates between 0.7 and 0.9 or 1.1 and 1.3, all misclassified  $R_e$  (i.e.,  $R_e$  estimates categorized differently by  
388 the CalCAT ensemble versus  $R_{ww}$ ) were estimated to be in the 0.9 to 1.1 range by both  $R_{ww}$  models. Consistent with  
389 this finding, both  $R_{ww}$  models demonstrated the lowest specificity and NPV for the 0.9 to 1.1 category across all



390 counties (specificity = 0.48-0.86 and 0.17-0.56; NPV = 0.51-0.85 and 0.31-0.67 for instantaneous and cohort,  
391 respectively). For  $R_e$  estimates between 0.7 and 0.9 or 1.1 and 1.3, the specificity and NPV remained greater than  
392 0.86 and 0.90, respectively, across all counties for both  $R_{ww}$  models. We observed inter- and intra- county- and  
393 model-dependent variability in relative magnitudes of the four reported metrics (sensitivity, specificity, PPV, NPV)  
394 across  $R_e$  classifications.

#### 395 396 *Comparison of $R_e$ temporalities*

397  
398 We calculated cross-correlation with a maximum lag of 20 days between  $R_{ww}$  and  $R_{cc}$  to numerically evaluate  
399 temporal alignment. Across all counties and  $R_{ww}$ - $R_{cc}$  pairings, cross-correlation coefficients ranged from 0.65 to 0.93  
400 (CalCAT ensemble: 0.72-0.93 and 0.69-0.89; sewershed-restricted  $R_{cc}$ : 0.65-0.87 and 0.67-0.89 for instantaneous  
401 and cohort  $R_{ww}$ , respectively). We report the range of time lags for cross-correlation coefficients within 0.05 of the  
402 maximum observed correlation value (Table 6, Figures S5 and S6). The reported range of time lags were wide and  
403 variable across counties,  $R_{cc}$  sources (CalCAT ensemble versus sewershed-restricted), and  $R_{ww}$  models  
404 (instantaneous versus cohort). Importantly, though, nearly all ranges included a lead time of 0 days, when  $R_{ww}$  was  
405 not temporally shifted with respect to  $R_{cc}$  (the two exceptions to this were: (1) instantaneous  $R_{ww}$  with respect to  
406 sewershed-restricted  $R_{cc}$  for Stanislaus county, and (2) cohort  $R_{ww}$  with respect to the CalCAT ensemble for  
407 Sacramento county); this is consistent with our previous observations of high concordance between non-time-shifted  
408  $R_{ww}$  and  $R_{cc}$  (Figures 3 and S2, Table 3).

409  
410 Within each county, the size and bounds (i.e., minimum and maximum) of the reported range of time lags with  
411 respect to sewershed-restricted  $R_{cc}$  was broadly similar between both  $R_{ww}$  models; this was not true for the range of  
412 time lags with respect to the CalCAT ensemble, which differs between  $R_{ww}$  models (boundaries of ranges with  
413 respect to the CalCAT ensemble: -3 to +10 days and -4 to +10 days of lag for instantaneous and cohort, respectively;  
414 boundaries of ranges with respect to the CalCAT ensemble: -8 to +3 days and -16 to +1 days of lag for instantaneous  
415 and cohort, respectively).

416

## 417 DISCUSSION

418  
419 We estimated instantaneous and cohort wastewater-based SARS-CoV-2 effective reproduction numbers for five  
420 California counties from May 1, 2022 to April 30, 2023. Across counties with varying population characteristics  
421 (e.g., demographics, sizes, clinical testing rates) and wastewater surveillance (e.g., sampling frequency, coverage),  
422 both instantaneous and cohort  $R_{ww}$  models demonstrated high correspondence with traditional  $R_{cc}$  models based on  
423 sewershed-restricted and county-wide case data. Correspondence was indicated by low average MAE, significant  
424 positive Spearman correlation, and high classification accuracy of  $R_{ww}$  with respect to  $R_{cc}$  for the entire study period  
425 (Table 3, Figure 4). These findings align with existing studies on  $R_{ww}$  estimation, which consistently reveal high  
426 concordance between  $R_{ww}$  and  $R_{cc}$  estimates across geographies and time.<sup>17,20,21</sup>  $R_{ww}$  concordance with the county-  
427 level CalCAT ensemble was generally greater than with sewershed-restricted  $R_{cc}$  (Table 3).

428  
429 Our work did not yield clear conclusions on the relative timing of  $R_{ww}$  and  $R_{cc}$ . Cross correlative analyses suggested  
430 strong associations ranging from a lead time of -16 days to a lag time of +10 days, depending on county,  $R_{cc}$  source  
431 (CalCAT ensemble versus sewershed-restricted), and  $R_{ww}$  model type (Table 6). These findings align mixed results  
432 in previous studies assessing the temporal alignment between wastewater and clinical surveillance data<sup>43-46</sup>; several  
433 factors, such as clinical data completeness, SARS-CoV-2 variant predominance, sewershed location, and population  
434 immunity, may influence the strength of wastewater as a leading indicator of disease incidence.

435 Similar SARS-CoV-2  $R_{ww}$  estimation pipelines are described in Huisman et al.,<sup>17</sup> Amman et al.,<sup>19</sup> and the publicly  
436 available “COVID-19 R estimation for California” dashboard by Worden et al. (<https://ca-covid-r.info/>). Both  
437 published studies produce sewershed-level instantaneous  $R_{ww}$ , while the dashboard produces county-level cohort  
438  $R_{ww}$ . All methods share a general pipeline schema: wastewater time series data is first processed and subsequently  
439 fed into an  $R_e$  model. However, the methods differ in their strategies for data transformation, deconvolution  
440 (including selection of infection to shedding delay distributions), and county aggregation. For data transformation,  
441 our method is most similar to Amman et al.,<sup>19</sup> as both implement a spline approach to smooth wastewater data. For  
442 deconvolution, our method is most similar to Huisman et al.,<sup>17</sup> as both implement a variant of the Richardson-Lucy  
443 expectation-maximization algorithm. For county aggregation, our method differs from that of the “COVID-19 R  
444 estimation for California” dashboard (<https://ca-covid-r.info/>): we perform population weighting of sewershed-level  
445  $R_{ww}$ , while the dashboard uses non-population-weighted, county-aggregated input wastewater data to estimate  $R_{ww}$ .  
446 We chose population-weighting to ensure sewersheds corresponding to larger or smaller populations have  
447 proportional influence on and representation in the county-level  $R_{ww}$  estimate. We opted for aggregating sewershed-  
448 restricted  $R_{ww}$  instead of sewershed-restricted raw RNA concentrations because the latter are not necessarily  
449 comparable between sewersheds due to environmental conditions and wastewater attributes.

450 There are several limitations to our study. First and most importantly, to validate  $R_{ww}$  we treated  $R_{cc}$  as the gold  
451 standard  $R_e$  metric. However, both clinical and wastewater data streams have their respective strengths and  
452 limitations. Clinical data streams are influenced by heterogeneous, time- and space-varying testing-related factors,  
453 ultimately capturing only a subset of infections. Wastewater data streams, while independent of some of the biases  
454 impacting clinical surveillance, require accurate characterization of the fecal shedding load distribution in order to  
455 be interpreted; the temporal dynamics of fecal shedding and its relationship to variant, immunity status, or disease  
456 severity, continue to be an ongoing area of investigation.<sup>47-49</sup> Given this uncertainty surrounding fecal shedding,  
457 pooled viral concentrations in wastewater are difficult to directly translate into unique infection or transmission  
458 events. Consequently,  $R_{ww}$  may not truly represent the average number of secondary cases caused by a newly  
459 infectious individual. Instead, it may be more indicative of other disease characteristics such as infectiousness (since  
460 highest shedding tends to occur when someone is most infectious). This is in contrast to traditional  $R_{cc}$  estimates,  
461 which use discrete units of disease burden (e.g., case counts) in conjunction with generation time or serial interval  
462 distributions to directly reconstruct and quantify transmission events. Ultimately, these limitations suggest that both  
463 clinical and wastewater data streams are imperfect proxies for COVID-19 disease dynamics; together though, both  
464 sources could potentially offer a more comprehensive picture of transmission dynamics and infection risk. While the  
465 present study frames  $R_{cc}$  as a gold-standard metric,  $R_{cc}$  and  $R_{ww}$  should instead be considered as two complementary  
466  $R_e$  metrics informed by synergistic data sources.

467 Second, county-level  $R_{ww}$  is based on sewershed-restricted wastewater data. Such data only reflects the shedding  
468 patterns and disease conditions of wastewater-surveilled communities and may not be generalizable to the entire  
469 county population. This has important implications for the utility of  $R_{ww}$  in the context of public health policies, such  
470 as health mandates, which are often applied at the county level. Any county-level policies informed by  $R_{ww}$  would be

471 tied to a transmission indicator that can only account for the sewershed-surveilled subset of the infected population.  
472 This is especially relevant for the state of California, where most counties (especially those in rural areas) have  
473 <50% of the county population surveilled by wastewater. Given that our study focuses on counties with >50%  
474 coverage, our findings on the agreement between county-aggregated, sewershed-level  $R_{ww}$  and county-level CalCAT  
475 ensemble  $R_{cc}$  may not translate to communities with lower programmatic wastewater surveillance. In addition, the  
476 wastewater-surveilled subset may demonstrate unique behaviors that are not representative of the entire county,  
477 potentially biasing  $R_{ww}$ .

478 Third, wastewater data is susceptible to location- or time-specific environmental conditions. Wastewater samples are  
479 relatively small volumes of wastewater collected from millions of gallons of organic and inorganic materials flowing  
480 through a treatment plant; as such, factors like rainfall, industrial input, temperature, and sewage travel time can  
481 impact measured SARS-CoV-2 RNA concentrations. This may weaken  $R_{ww}$ - $R_{cc}$  concordance in specific counties.

482 There are also key limitations within our  $R_{ww}$  estimation process. For all five counties in our study, we assume the  
483 experimentally inferred, optimized infection to shedding distribution for San Jose described by Huisman et al.<sup>17</sup> This  
484 distribution maximized  $R_{ww}$ - $R_{cc}$  agreement for a single treatment plant studied by Huisman et al.,<sup>17</sup> and is therefore  
485 not reflective of the highly variable fecal shedding profile amongst individuals and populations. This upstream  
486 assumption in our pipeline impacts the number of inferred infections per day from wastewater, ultimately  
487 influencing  $R_{ww}$  estimates. Similarly, specific decisions were made in the estimation process related to smoothing  
488 (e.g., methodology), trimming (e.g., width or window), and deconvolution (e.g., choice of incubation period,  
489 generation time) which may influence downstream results.

490 Lastly, it is important to consider practical limitations relevant for operationalization of our methods. Firstly, our  
491 study is a retrospective analysis using readily available historical surveillance data that has been updated post hoc as  
492 more accurate information was reported. This contrasts with real-time or emergency conditions, when both  $R_{cc}$  and  
493  $R_{ww}$  can only rely on data available at a given time. As such, real-time operationalization of the  $R_{ww}$  estimation  
494 procedure outlined in this study may require additional data pre-processing, nowcasting, and forecasting steps in the  
495 absence of current data. Secondly, counties were selected for this pilot analysis to prioritize similar laboratorial  
496 methodologies, long-term sampling histories, high population coverage by wastewater surveillance, and  
497 representation of diverse (rural and urban) demographics. Such historically comprehensive, consistently measured,  
498 and frequently sampled wastewater data is not available for all sewersheds, counties, or regions. Therefore, the  
499 performance of the  $R_{ww}$  estimation process presented here may vary considerably when applied to other jurisdictions  
500 in California and may not be generalizable. In the future, investigating  $R_{ww}$  estimation in a larger suite of counties  
501 and regions will be essential to comprehensively understanding the utility of our method in a wide range of  
502 scenarios. Another future extension includes identifying the minimum wastewater county coverage and sampling  
503 frequency required for high  $R_{ww}$ - $R_{cc}$  concordance, which would increase county representation (building upon initial  
504 work done by Huisman et al. 2022 for San Jose). Finally, methodological differences can impact measured  
505 wastewater concentrations, which in turn can complicate comparability between sites. While we selected  
506 sewersheds using similar laboratory methods for this study, some differences still remained in how wastewater  
507 solids were collected, processed, or quantified. We do not have conclusive evidence on the impact of even minor  
508 differences in laboratory methodologies on downstream  $R_{ww}$  estimation. Moreover, best practices for combining  
509 wastewater data across multiple methods and laboratories (either over time for a single site, or for distinct sites  
510 within a single county) remain an area of ongoing and future research.

511  
512 We estimated county-level  $R_{ww}$ , which we demonstrated tracks closely with robust traditional case-based  $R_{cc}$   
513 estimates. Our results support the future use of  $R_{ww}$  as an additional epidemiological tool with public health  
514 relevance in the context of disease dynamics monitoring. Moreover, our study provides a generalizable, robust, and  
515 operationalizable framework for estimating county-level  $R_{ww}$ . On the basis of this research, we produced publicly  
516 available SARS-CoV-2  $R_{ww}$  nowcasts for the CalCAT dashboard (<https://calcat.covid19.ca.gov/cacovidmodels/>),  
517 advancing COVID-19 transmission monitoring for the state of California. This study and the described approach can  
518 inform other jurisdictions' construction and implementation of sewershed- and county-level  $R_{ww}$  estimation  
519 pipelines. In the future, the described estimation procedure could be applied to other pathogens with available  
520 wastewater and case surveillance data (e.g., respiratory syncytial virus [RSV], influenza).

521

## 522 REFERENCES

- 523 1. New Framework and Software to Estimate Time-Varying Reproduction Numbers During Epidemics | American  
524 Journal of Epidemiology | Oxford Academic. Accessed November 21, 2023.  
525 <https://academic.oup.com/aje/article/178/9/1505/89262?login=false>
- 526 2. Joint Research Centre (European Commission), Annunziato A, Asikainen T. *Effective Reproduction Number*  
527 *Estimation from Data Series*. Publications Office of the European Union; 2020. Accessed November 21, 2023.  
528 <https://data.europa.eu/doi/10.2760/036156>
- 529 3. Linka K, Peirlinck M, Kuhl E. The reproduction number of COVID-19 and its correlation with public health  
530 interventions. *Comput Mech*. 2020;66(4):1035-1050. doi:10.1007/s00466-020-01880-8
- 531 4. Fauci AS, Lane HC, Redfield RR. Covid-19 — Navigating the Uncharted. *N Engl J Med*. 2020;382(13):1268-  
532 1269. doi:10.1056/NEJMe2002387
- 533 5. Dainton C, Hay A. Quantifying the relationship between lockdowns, mobility, and effective reproduction  
534 number (Rt) during the COVID-19 pandemic in the Greater Toronto Area. *BMC Public Health*.  
535 2021;21(1):1658. doi:10.1186/s12889-021-11684-x
- 536 6. Inglesby TV. Public Health Measures and the Reproduction Number of SARS-CoV-2. *JAMA*.  
537 2020;323(21):2186-2187. doi:10.1001/jama.2020.7878
- 538 7. Pitzer VE, Chitwood M, Havumaki J, et al. The Impact of Changes in Diagnostic Testing Practices on  
539 Estimates of COVID-19 Transmission in the United States. *Am J Epidemiol*. Published online April 8,  
540 2021:kwab089. doi:10.1093/aje/kwab089
- 541 8. Nash RK, Nouvellet P, Cori A. Real-time estimation of the epidemic reproduction number: Scoping review of  
542 the applications and challenges. *PLOS Digit Health*. 2022;1(6):e0000052. doi:10.1371/journal.pdig.0000052
- 543 9. Li X, Zhang S, Sherchan S, et al. Correlation between SARS-CoV-2 RNA concentration in wastewater and  
544 COVID-19 cases in community: A systematic review and meta-analysis. *J Hazard Mater*. 2023;441:129848.  
545 doi:10.1016/j.jhazmat.2022.129848
- 546 10. Rabe A, Ravuri S, Burnor E, et al. Correlation between wastewater and COVID-19 case incidence rates in  
547 major California sewersheds across three variant periods. *J Water Health*. 2023;21(9):1303-1317.  
548 doi:10.2166/wh.2023.173
- 549 11. Bivins A, North D, Ahmad A, et al. Wastewater-Based Epidemiology: Global Collaborative to Maximize  
550 Contributions in the Fight Against COVID-19. *Environ Sci Technol*. 2020;54(13):7754-7757.  
551 doi:10.1021/acs.est.0c02388
- 552 12. Peccia J, Zulli A, Brackney DE, et al. Measurement of SARS-CoV-2 RNA in wastewater tracks community  
553 infection dynamics. *Nat Biotechnol*. 2020;38(10):1164-1167. doi:10.1038/s41587-020-0684-z
- 554 13. Wolfe MK, Topol A, Knudson A, et al. High-Frequency, High-Throughput Quantification of SARS-CoV-2  
555 RNA in Wastewater Settled Solids at Eight Publicly Owned Treatment Works in Northern California Shows  
556 Strong Association with COVID-19 Incidence. *mSystems*. 2021;6(5):10.1128/msystems.00829-21.  
557 doi:10.1128/msystems.00829-21
- 558 14. Kirby AE, Walters MS, Jennings WC, et al. Using Wastewater Surveillance Data to Support the COVID-19  
559 Response — United States, 2020–2021. *Morb Mortal Wkly Rep*. 2021;70(36):1242-1244.  
560 doi:10.15585/mmwr.mm7036a2
- 561 15. Olesen SW, Imakaev M, Duvallet C. Making waves: Defining the lead time of wastewater-based epidemiology  
562 for COVID-19. *Water Res*. 2021;202:117433. doi:10.1016/j.watres.2021.117433

- 563 16. Zhu Y, Oishi W, Maruo C, et al. Early warning of COVID-19 via wastewater-based epidemiology: potential  
564 and bottlenecks. *Sci Total Environ.* 2021;767:145124. doi:10.1016/j.scitotenv.2021.145124
- 565 17. Huisman JS, Scire J, Caduff L, et al. Wastewater-Based Estimation of the Effective Reproductive Number of  
566 SARS-CoV-2. *Environ Health Perspect.* 2022;130(5):057011. doi:10.1289/EHP10050
- 567 18. Nourbakhsh S, Fazil A, Li M, et al. A wastewater-based epidemic model for SARS-CoV-2 with application to  
568 three Canadian cities. *Epidemics.* 2022;39:100560. doi:10.1016/j.epidem.2022.100560
- 569 19. Amman F, Markt R, Endler L, et al. Viral variant-resolved wastewater surveillance of SARS-CoV-2 at national  
570 scale. *Nat Biotechnol.* 2022;40(12):1814-1822. doi:10.1038/s41587-022-01387-y
- 571 20. Nadeau S, Devaux AJ, Bagutti C, et al. Influenza transmission dynamics quantified from wastewater. Published  
572 online January 25, 2023;2023.01.23.23284894. doi:10.1101/2023.01.23.23284894
- 573 21. Jiang G, Wu J, Weidhaas J, et al. Artificial neural network-based estimation of COVID-19 case numbers and  
574 effective reproduction rate using wastewater-based epidemiology. *Water Res.* 2022;218:118451.  
575 doi:10.1016/j.watres.2022.118451
- 576 22. Wallinga J, Teunis P. Different epidemic curves for severe acute respiratory syndrome reveal similar impacts of  
577 control measures. *Am J Epidemiol.* 2004;160(6):509-516. doi:10.1093/aje/kwh255
- 578 23. Borchardt MA, Boehm AB, Salit M, Spencer SK, Wigginton KR, Noble RT. The Environmental Microbiology  
579 Minimum Information (EMMI) Guidelines: qPCR and dPCR Quality and Reporting for Environmental  
580 Microbiology. *Environ Sci Technol.* 2021;55(15):10210-10223. doi:10.1021/acs.est.1c01767
- 581 24. Kim S, C. Kennedy L, K. Wolfe M, et al. SARS-CoV-2 RNA is enriched by orders of magnitude in primary  
582 settled solids relative to liquid wastewater at publicly owned treatment works. *Environ Sci Water Res Technol.*  
583 2022;8(4):757-770. doi:10.1039/D1EW00826A
- 584 25. Wolfe MK, Archana A, Catoe D, et al. Scaling of SARS-CoV-2 RNA in Settled Solids from Multiple  
585 Wastewater Treatment Plants to Compare Incidence Rates of Laboratory-Confirmed COVID-19 in Their  
586 Sewersheds. *Environ Sci Technol Lett.* 2021;8(5):398-404. doi:10.1021/acs.estlett.1c00184
- 587 26. Boehm AB, Wolfe MK, Wigginton KR, et al. Human viral nucleic acids concentrations in wastewater solids  
588 from Central and Coastal California USA. *Sci Data.* 2023;10(1):396. doi:10.1038/s41597-023-02297-7
- 589 27. Kadonsky KF, Naughton CC, Susa M, et al. Expansion of wastewater-based disease surveillance to improve  
590 health equity in California's Central Valley: sequential shifts in case-to-wastewater and hospitalization-to-  
591 wastewater ratios. *Front Public Health.* 2023;11. Accessed November 21, 2023.  
592 <https://www.frontiersin.org/articles/10.3389/fpubh.2023.1141097>
- 593 28. M. Pecson B, Darby E, N. Haas C, et al. Reproducibility and sensitivity of 36 methods to quantify the SARS-  
594 CoV-2 genetic signal in raw wastewater: findings from an interlaboratory methods evaluation in the U.S.  
595 *Environ Sci Water Res Technol.* 2021;7(3):504-520. doi:10.1039/D0EW00946F
- 596 29. Medina CY, Kadonsky KF, Roman FA, et al. The need of an environmental justice approach for wastewater  
597 based epidemiology for rural and disadvantaged communities: A review in California. *Curr Opin Environ Sci*  
598 *Health.* 2022;27:100348. doi:10.1016/j.coesh.2022.100348
- 599 30. Yu AT, Hughes B, Wolfe MK, et al. Estimating Relative Abundance of 2 SARS-CoV-2 Variants through  
600 Wastewater Surveillance at 2 Large Metropolitan Sites, United States. *Emerg Infect Dis.* 2022;28(5):940-947.  
601 doi:10.3201/eid2805.212488

- 602 31. White LA, McCorvie R, Crow D, Jain S, León TM. Assessing the accuracy of California county level COVID-  
603 19 hospitalization forecasts to inform public policy decision making. *BMC Public Health*. 2023;23(1):782.  
604 doi:10.1186/s12889-023-15649-0
- 605 32. Evaluation of individual and ensemble probabilistic forecasts of COVID-19 mortality in the United States |  
606 PNAS. Accessed November 21, 2023. <https://www.pnas.org/doi/abs/10.1073/pnas.2113561119>
- 607 33. Helwig N. npreg: Nonparametric Regression via Smoothing Splines. Published online 2022. [https://CRAN.R-](https://CRAN.R-project.org/package=npreg)  
608 [project.org/package=npreg](https://CRAN.R-project.org/package=npreg)
- 609 34. Gostic KM, McGough L, Baskerville EB, et al. Practical considerations for measuring the effective  
610 reproductive number, Rt. *PLOS Comput Biol*. 2020;16(12):e1008409. doi:10.1371/journal.pcbi.1008409
- 611 35. Del Águila-Mejía J, Wallmann R, Calvo-Montes J, Rodríguez-Lozano J, Valle-Madrado T, Aginagalde-  
612 Llorente A. Secondary Attack Rate, Transmission and Incubation Periods, and Serial Interval of SARS-CoV-2  
613 Omicron Variant, Spain. *Emerg Infect Dis*. 2022;28(6):1224-1228. doi:10.3201/eid2806.220158
- 614 36. Scire J, Huisman JS, Grosu A, et al. estimateR: an R package to estimate and monitor the effective reproductive  
615 number. *BMC Bioinformatics*. 2023;24(1):310. doi:10.1186/s12859-023-05428-4
- 616 37. Pierre-Yves Boelle, Obadia T. R0: Estimation of R0 and Real-Time Reproduction Number from Epidemics.  
617 Published online 2023. <https://CRAN.R-project.org/package=R0>
- 618 38. Cauchemez S, Boëlle PY, Thomas G, Valleron AJ. Estimating in Real Time the Efficacy of Measures to  
619 Control Emerging Communicable Diseases. *Am J Epidemiol*. 2006;164(6):591-597. doi:10.1093/aje/kwj274
- 620 39. Manica M, Bellis AD, Guzzetta G, et al. Intrinsic generation time of the SARS-CoV-2 Omicron variant: An  
621 observational study of household transmission. *Lancet Reg Health – Eur*. 2022;19.  
622 doi:10.1016/j.lanepe.2022.100446
- 623 40. Ahmadi J, Basiri E, Kundu D. Confidence and prediction intervals based on interpolated records. *J*  
624 *Nonparametric Stat*. 2017;29(1):1-21. doi:10.1080/10485252.2016.1239826
- 625 41. Beutner E, Cramer E. Using linear interpolation to reduce the order of the coverage error of nonparametric  
626 prediction intervals based on right-censored data. *J Multivar Anal*. 2014;129:95-109.  
627 doi:10.1016/j.jmva.2014.04.007
- 628 42. Kuhn M. caret: Classification and Regression Training. Published online 2022. [https://CRAN.R-](https://CRAN.R-project.org/package=caret)  
629 [project.org/package=caret](https://CRAN.R-project.org/package=caret)
- 630 43. Hegazy N, Cowan A, D’Aoust PM, et al. Understanding the dynamic relation between wastewater SARS-CoV-  
631 2 signal and clinical metrics throughout the pandemic. *Sci Total Environ*. 2022;853:158458.  
632 doi:10.1016/j.scitotenv.2022.158458
- 633 44. Duvallet C, Wu F, McElroy KA, et al. Nationwide Trends in COVID-19 Cases and SARS-CoV-2 RNA  
634 Wastewater Concentrations in the United States. *ACS EST Water*. 2022;2(11):1899-1909.  
635 doi:10.1021/acsestwater.1c00434
- 636 45. Li L, Mazurowski L, Dewan A, et al. Longitudinal monitoring of SARS-CoV-2 in wastewater using viral  
637 genetic markers and the estimation of unconfirmed COVID-19 cases. *Sci Total Environ*. 2022;817:152958.  
638 doi:10.1016/j.scitotenv.2022.152958
- 639 46. Morvan M, Jacomo AL, Souque C, et al. An analysis of 45 large-scale wastewater sites in England to estimate  
640 SARS-CoV-2 community prevalence. *Nat Commun*. 2022;13(1):4313. doi:10.1038/s41467-022-31753-y

- 641 47. Hoffmann T, Alsing J. *Faecal Shedding Models for SARS-CoV-2 RNA amongst Hospitalised Patients and*  
642 *Implications for Wastewater-Based Epidemiology*. *Infectious Diseases (except HIV/AIDS)*; 2021.  
643 doi:10.1101/2021.03.16.21253603
- 644 48. Crank K, Chen W, Bivins A, Lowry S, Bibby K. Contribution of SARS-CoV-2 RNA shedding routes to RNA  
645 loads in wastewater. *Sci Total Environ*. 2022;806:150376. doi:10.1016/j.scitotenv.2021.150376
- 646 49. Arts PJ, Kelly JD, Midgley CM, et al. Longitudinal and quantitative fecal shedding dynamics of SARS-CoV-2,  
647 pepper mild mottle virus, and crAssphage. *mSphere*. 2023;8(4):e00132-23. doi:10.1128/msphere.00132-23
- 648 50. Topol A. *High Throughput Pre-Analytical Processing of Wastewater Settled Solids for SARS-CoV-2 RNA*  
649 *Analyses V2*; 2021. doi:10.17504/protocols.io.b2kmqcu6
- 650 51. Sciences) AT (Verily L, Sciences) BW (Verily L, Michigan) KW (Univ, Boehm AB, marlene.wolfe. High  
651 Throughput SARS-COV-2, PMMOV, and BCoV quantification in settled solids using digital RT-PCR.  
652 Published online April 21, 2021. Accessed November 22, 2023. [https://www.protocols.io/view/high-](https://www.protocols.io/view/high-throughput-sars-cov-2-pmmov-and-bcov-quantifi-btywnpxe)  
653 [throughput-sars-cov-2-pmmov-and-bcov-quantifi-btywnpxe](https://www.protocols.io/view/high-throughput-sars-cov-2-pmmov-and-bcov-quantifi-btywnpxe)
- 654 52. Boehm AB, Wolfe MK, White B, Hughes B, Duong D. Divergence of wastewater SARS-CoV-2 and reported  
655 laboratory-confirmed COVID-19 incident case data coincident with wide-spread availability of at-home  
656 COVID-19 antigen tests. *PeerJ*. 2023;11:e15631. doi:10.7717/peerj.15631
- 657

658 **ACKNOWLEDGEMENTS**

659  
660 The wastewater sampling conducted through Method 1 was supported by gifts from the CDC Foundation and the  
661 Sergey Brin Family Foundation to ABB. Additional research support for Method 2 were provided through a  
662 philanthropic gift to the University of California, Davis. CDPH wastewater surveillance efforts are supported in part  
663 by the Epidemiology and Laboratory Capacity for Infectious Diseases Cooperative Agreement (no.  
664 6NU50CK000539-04-02) from CDC.

665 The authors sincerely thank the operators at Sacramento Regional Wastewater Treatment Plan, Esparto Wastewater  
666 Treatment Facility, Woodland Water Pollution Control Facility, Winters Water Treatment Facility, City of Davis  
667 Wastewater Treatment Plant, Modesto's Sutter Primary Treatment Facility, Turlock Regional Water Quality Control  
668 Facility, Silicon Valley Clean Water, San Jose Santa Clara Regional Wastewater Facility, City of Sunnyvale Water  
669 Pollution Control Plant, Palo Alto Regional Water Quality Control Plant, South County Regional Wastewater  
670 Authority, Oceanside Water Pollution Control Plant, and Southeast Water Pollution Control Plant for providing  
671 wastewater samples.

672 The authors further thank the modeling and wastewater surveillance sections at CDPH for input and guidance on the  
673 data sources and procedure for  $R_{ww}$  estimation outlined in this study.

674  
675 **DATA SHARING**

676 All wastewater data used in this study is publicly accessible through the CA Open Data Portal at  
677 <https://data.ca.gov/dataset/covid-19-wastewater-surveillance-data-california>. Models contributing to the CalCAT  
678 ensemble also use data publicly accessible through the CA Open Data Portal, such as downloadable case counts,  
679 hospitalizations, deaths and test positivity (<https://data.chhs.ca.gov/organization/california-department-of-public-health>). Sewershed-restricted COVID-19 case data reported to CDPH is not publicly available; readers should  
680 contact the corresponding author with data requests.  
681

682  
683 **PUBLICATION POLICY DISCLAIMER**

684  
685 The findings and conclusions in this article are those of the author(s) and do not necessarily represent the views or  
686 opinions of the California Department of Public Health or the California Health and Human Services Agency.  
687



688 **TABLES**

689 **Table 1. Population and sampling characteristics of counties and wastewater treatment plants included in the**  
 690 **analyses.**  
 691

| County        | Wastewater Treatment Plant | Monitoring Lab                                                        | Population Served by WW Treatment Plant | County Population Size | Coverage | Median Weekly County Testing Rate (per 100,000) | WW Sample Type                                               | Median WW Weekly Sampling Frequency | Total WW Samples |
|---------------|----------------------------|-----------------------------------------------------------------------|-----------------------------------------|------------------------|----------|-------------------------------------------------|--------------------------------------------------------------|-------------------------------------|------------------|
| Sacramento    | Sacramento                 | Method 1                                                              | 1,480,000                               | 1,570,000              | 0.94     | 1,160                                           | Primary settled solids                                       | 7                                   | 366              |
| San Francisco | San Francisco Southeast    | Method 1                                                              | 750,000                                 | 890,000                | 1        | 2,040                                           | Primary settled solids                                       | 7                                   | 340              |
|               | San Francisco Oceanside    | Method 1                                                              | 250,000                                 | 890,000                | 1        | 2,040                                           | Primary settled solids                                       | 7                                   | 354              |
| Santa Clara   | Palo Alto                  | Method 1                                                              | 236,000                                 | 1,970,000              | 1        | 2,175                                           | Primary settled solids                                       | 7                                   | 366              |
|               | Gilroy/Morgan Hill         | Method 1                                                              | 110,338                                 | 1,970,000              | 1        | 2,175                                           | Primary settled solids                                       | 7                                   | 366              |
|               | San Jose                   | Method 1                                                              | 1,500,000                               | 1,970,000              | 1        | 2,175                                           | Primary settled solids                                       | 7                                   | 366              |
|               | Sunnyvale                  | Method 1                                                              | 153,000                                 | 1,970,000              | 1        | 2,175                                           | Primary settled solids                                       | 7                                   | 362              |
| Stanislaus    | Modesto                    | Method 2: May 1 – Nov 30, 2022<br>Method 1: Dec 1, 2022 – May 1, 2023 | 230,000                                 | 550,000                | 0.57     | 1,090                                           | Primary settled solids                                       | Method 2: 4<br>Method 1: 3          | 198              |
|               | Turlock                    | Method 2: May 1 – Nov 30, 2022<br>Method 1: Dec 1, 2022 – May 1, 2023 | 86,000                                  | 550,000                | 0.57     | 1,090                                           | Solids settled from 24-hour time-weighted composite influent | Method 2: 4<br>Method 1: 3          | 198              |

|      |          |                                                                       |        |         |      |       |                                                                 |                            |     |
|------|----------|-----------------------------------------------------------------------|--------|---------|------|-------|-----------------------------------------------------------------|----------------------------|-----|
| Yolo | Davis    | Method 1                                                              | 70,717 | 220,000 | 0.63 | 2,230 | Primary settled solids                                          | 7                          | 298 |
|      | Esparto  | Method 2: May 1 – Nov 30, 2022<br>Method 1: Dec 1, 2022 – May 1, 2023 | 3,272  | 220,000 | 0.63 | 2,230 | Solids settled from 24-hour time-weighted composite influent    | Method 2: 4<br>Method 1: 3 | 186 |
|      | Winters  | Method 2: May 1 – Nov 30, 2022<br>Method 1: Dec 1, 2022 – May 1, 2023 | 7,285  | 220,000 | 0.63 | 2,230 | Solids settled from raw, composite wastewater from pump station | Method 2: 4<br>Method 1: 3 | 184 |
|      | Woodland | Method 2: May 1 – Nov 30, 2022<br>Method 1: Dec 1, 2022 – May 1, 2023 | 59,000 | 220,000 | 0.63 | 2,230 | Solids settled from 24-hour time-weighted composite influent    | Method 2: 4<br>Method 1: 3 | 196 |

692  
693 Note: Counties and wastewater treatment plants included in this study were selected based on consistency in  
694 laboratory methodology (Methods 1 and 2 both process wastewater settled solids and utilized laboratory protocols  
695 designed to be similar), high (>50%) coverage (proportion of the county’s population that reside within sewersheds  
696 contributing to wastewater monitoring data), and representation of diverse demographics (urban and rural). Samples  
697 from six sites (Modesto, Merced, Turlock, Esparto, Winters, and Woodland) were processed via Method 2 for the  
698 first part of the study period, followed by Method 1 for the remaining part of the study period. Abbreviations: WW,  
699 wastewater  
700  
701

702 **Table 2. Key distribution parameters used in sewershed-level  $R_e$  estimation pipeline.**

| Distribution          | Purpose                                                      | Relevant $R_e$                           | Distribution Type | Mean (SD)   | Distribution Parameters      | Source                            |
|-----------------------|--------------------------------------------------------------|------------------------------------------|-------------------|-------------|------------------------------|-----------------------------------|
| Generation time       | Sewershed-restricted $R_e$ estimation from input time series | $R_{ww}$ ; sewershed-restricted $R_{cc}$ | Gamma             | 6.84 (4.48) | Shape: 2.33<br>Scale: 2.93   | Manica et al. <sup>39</sup>       |
| Infection to shedding | Deconvolution of wastewater concentrations                   | $R_{ww}$                                 | Gamma             | 5 (0.5)     | Shape: 100<br>Scale: 0.05    | Huisman et al. <sup>17</sup>      |
| Incubation period     | Deconvolution of sewershed-restricted case counts            | sewershed-restricted $R_{cc}$            | Lognormal         | 3.1 (2.6)   | Meanlog: 0.87<br>Sdlog: 0.73 | Aguila-Mejia et al. <sup>35</sup> |
| Onset to NAAT result  | Deconvolution of sewershed-restricted case counts            | sewershed-restricted $R_{cc}$            | Lognormal         | 3.35 (2.84) | Meanlog: 0.94<br>Sdlog: 0.73 | CA cases line list                |

703  
704 Note: Estimation of instantaneous and cohort sewershed-level  $R_e$  requires a user-specified generation time  
705 distribution. Estimation also requires a time series input of incidence data indexed by date of infection. To index  
706 both raw sewershed-restricted case counts and wastewater viral concentrations by date of infection, we performed  
707 deconvolution. For cases, we deconvolved using two delay distributions. For wastewater, we deconvolved using a  
708 single delay distribution optimized for San Jose, California. Abbreviations: NAAT, nucleic acid amplification test,  
709  $R_e$ , effective reproduction number;  $R_{ww}$ , sewershed-restricted, wastewater-based effective reproduction number;  $R_{cc}$ ,  
710 case-based effective reproduction number; SD, standard deviation.  
711  
712

713 **Table 3. Comparative analyses of county-level  $R_{ww}$  and  $R_{cc}$  trajectories using mean absolute error and**  
 714 **Spearman’s rank correlation.**

| County        | Type of $R_{cc}$ estimate  | MAE, Instantaneous $R_{ww}$ | MAE, Cohort $R_{ww}$ | Spearman’s $\rho$ , Instantaneous $R_{ww}$ | $\rho$ p-value, Instantaneous $R_{ww}$ | Spearman’s $\rho$ , Cohort $R_{ww}$ | $\rho$ p-value, Cohort $R_{ww}$ |
|---------------|----------------------------|-----------------------------|----------------------|--------------------------------------------|----------------------------------------|-------------------------------------|---------------------------------|
| Sacramento    | Sewershed-restricted cases | 0.082                       | 0.072                | 0.719                                      | 3.20E-59                               | 0.712                               | 8.80E-58                        |
|               | CalCAT ensemble            | 0.042                       | 0.052                | 0.775                                      | 3.10E-74                               | 0.621                               | 2.30E-40                        |
| San Francisco | Sewershed-restricted cases | 0.077                       | 0.071                | 0.726                                      | 5.30E-61                               | 0.754                               | 3.10E-68                        |
|               | CalCAT ensemble            | 0.025                       | 0.031                | 0.936                                      | 3.80E-167                              | 0.866                               | 2.50E-111                       |
| Santa Clara   | Sewershed-restricted cases | 0.064                       | 0.059                | 0.800                                      | 1.20E-82                               | 0.823                               | 5.50E-91                        |
|               | CalCAT ensemble            | 0.028                       | 0.043                | 0.843                                      | 9.10E-100                              | 0.668                               | 1.70E-48                        |
| Stanislaus    | Sewershed-restricted cases | 0.087                       | 0.066                | 0.779                                      | 1.30E-75                               | 0.873                               | 1.60E-115                       |
|               | CalCAT ensemble            | 0.052                       | 0.065                | 0.775                                      | 2.20E-74                               | 0.662                               | 2.50E-47                        |
| Yolo          | Sewershed-restricted cases | 0.081                       | 0.073                | 0.657                                      | 2.10E-46                               | 0.658                               | 1.30E-46                        |
|               | CalCAT ensemble            | 0.016                       | 0.019                | 0.891                                      | 3.20E-126                              | 0.884                               | 1.10E-121                       |

715 Note: By calculating mean absolute errors and Spearman’s rank correlations, we compared the magnitude and  
 716 direction of instantaneous and cohort  $R_{ww}$  models to two types of  $R_{cc}$  estimates: (1) a publicly available ensemble of  
 717 county-wide  $R_{cc}$  estimates (“CalCAT ensemble”), and (2) a county-aggregated, sewershed-restricted  $R_{cc}$ . Reported p-  
 718 values correspond to Spearman’s rank correlation,  $\rho$  ( $R_{ww}$  compared against  $R_{cc}$ ). Abbreviations:  $R_{ww}$ , sewershed-  
 719 restricted, wastewater-based effective reproduction number;  $R_{cc}$ , case-based effective reproduction number; MAE,  
 720 mean absolute error;  $\rho$  (rho), Spearman’s rank correlation coefficient.

721  
 722  
 723

724 **Table 4. Summary metrics from multi-class confusion matrix analysis evaluating agreement between**  
 725 **instantaneous  $R_{ww}$  and the CalCAT ensemble.**

| County        | $R_e$ Classification | Overall Accuracy | Sensitivity | Specificity | PPV             | NPV  |     |
|---------------|----------------------|------------------|-------------|-------------|-----------------|------|-----|
|               |                      |                  |             |             |                 |      | 726 |
|               |                      |                  |             |             |                 |      | 727 |
| Sacramento    | 0.7-0.9              | 0.87             | 0.73        | 0.89        | 0.17            | 0.99 | 728 |
|               | 0.9-1.1              | <sup>a</sup>     | 0.87        | 0.84        | 0.97            | 0.51 | 729 |
|               | 1.1-1.3              |                  | 0.87        | 0.99        | 0.94            | 0.98 | 730 |
| San Francisco | 0.7-0.9              | 0.89             | 0.32        | 0.99        | 0.75            | 0.96 | 731 |
|               | 0.9-1.1              |                  | 0.93        | 0.64        | 0.95            | 0.57 | 732 |
|               | 1.1-1.3              |                  | 0.86        | 0.94        | 0.53            | 0.99 | 733 |
| Santa Clara   | 0.7-0.9              | 0.90             | 0.75        | 0.95        | 0.32            | 0.99 | 734 |
|               | 0.9-1.1              |                  | 0.90        | 0.86        | 0.97            | 0.63 | 735 |
|               | 1.1-1.3              |                  | 0.89        | 0.97        | 0.79            | 0.98 | 736 |
| Stanislaus    | 0.7-0.9              | 0.76             | 0.95        | 0.94        | 0.73            | 0.99 | 737 |
|               | 0.9-1.1              |                  | 0.78        | 0.79        | 0.89            | 0.63 | 738 |
|               | 1.1-1.3              |                  | 0.52        | 0.88        | 0.46            | 0.9  | 739 |
| Yolo          | 0.7-0.9              | 0.96             | 0           | 1           | <sup>b</sup> NA | 0.98 | 740 |
|               | 0.9-1.1              |                  | 0.99        | 0.48        | 0.97            | 0.85 | 741 |
|               | 1.1-1.3              |                  | 0.65        | 0.99        | 0.85            | 0.98 | 742 |

741 Note: We produced multi-class confusion matrices relating instantaneous  $R_{ww}$  to the CalCAT ensemble (real-time,  
 742 ongoing  $R_{cc}$  estimates with relevance for statewide public health).  $R_e$  values were classified into transmission  
 743 strength categories based on magnitude (<0.7-0.9, 0.9-1.1, 1.1-1.3, >1.3, which represent a strong decrease,  
 744 decrease, stability, increase, and strong increase in transmission, respectively). The resulting sensitivity, specificity,  
 745 positive predictive and negative predictive values for each  $R_e$  category are reported. The overall accuracy for each  
 746 county-level  $R_{ww}$  is also reported. We did not report two  $R_e$  categories (< 0.7, >1.3), which had no observations  
 747 during the study period. <sup>a</sup>All gray boxes indicate values identical to the closest, previous non-zero entry within the  
 748 same column. <sup>b</sup>NA entries correspond to  $R_e$  categories with zero  $R_{ww}$  predictions during the study period.  $R_e$ ,  
 749 effective reproduction number; PPV, Positive Predictive Value; NPV, Negative Predictive Value.  
 750

751  
 752

753 **Table 5. Summary metrics from multi-class confusion matrix analysis evaluating agreement between cohort**  
 754  **$R_{ww}$  and the CalCAT ensemble.**

| County        | $R_e$ Classification | Overall Accuracy | Sensitivity | Specificity | PPV             | NPV  |     |
|---------------|----------------------|------------------|-------------|-------------|-----------------|------|-----|
|               | 0.7-0.9              | 0.79             | 0           | 0.87        | 0               | 0.97 | 755 |
| Sacramento    | 0.9-1.1              | <sup>a</sup>     | 0.84        | 0.46        | 0.91            | 0.31 | 756 |
|               | 1.1-1.3              |                  | 0.59        | 0.98        | 0.82            | 0.95 | 757 |
|               |                      |                  |             |             |                 |      | 758 |
| San Francisco | 0.7-0.9              | 0.85             | 0           | 1           | <sup>b</sup> NA | 0.95 | 759 |
|               | 0.9-1.1              |                  | 0.93        | 0.28        | 0.9             | 0.38 | 760 |
|               | 1.1-1.3              |                  | 0.46        | 0.94        | 0.38            | 0.95 | 761 |
| Santa Clara   | 0.7-0.9              | 0.82             | 0           | 0.95        | 0               | 0.97 | 762 |
|               | 0.9-1.1              |                  | 0.89        | 0.46        | 0.89            | 0.44 | 763 |
|               | 1.1-1.3              |                  | 0.57        | 0.95        | 0.63            | 0.94 | 764 |
| Stanislaus    | 0.7-0.9              | 0.64             | 0.54        | 0.89        | 0.48            | 0.91 | 765 |
|               | 0.9-1.1              |                  | 0.70        | 0.56        | 0.77            | 0.47 | 766 |
|               | 1.1-1.3              |                  | 0.5         | 0.86        | 0.41            | 0.9  | 767 |
| Yolo          | 0.7-0.9              | 0.94             | 0           | 1           | NA              | 0.98 | 768 |
|               | 0.9-1.1              |                  | 0.99        | 0.17        | 0.95            | 0.67 | 769 |
|               | 1.1-1.3              |                  | 0.24        | 0.99        | 0.67            | 0.96 | 770 |

770 Note: We produced multi-class confusion matrices relating instantaneous  $R_{ww}$  to the CalCAT ensemble (real-time,  
 771 ongoing  $R_{cc}$  estimates with relevance for statewide public health).  $R_e$  values were classified into transmission  
 772 strength categories based on magnitude (<0.7-0.9, 0.9-1.1, 1.1-1.3, >1.3, which represent a strong decrease,  
 773 decrease, stability, increase, and strong increase in  $R_e$ , respectively). The resulting sensitivity, specificity, positive  
 774 predictive and negative predictive values for each  $R_e$  category are reported. The overall accuracy for each county-  
 775 level  $R_{ww}$  is also reported. We did not report two  $R_e$  categories (< 0.7, >1.3), which had no observations during the  
 776 study period. <sup>a</sup>All gray boxes indicate values identical to the closest, previous non-zero entry within the same  
 777 column. <sup>b</sup>NA entries correspond to  $R_e$  categories with zero  $R_{ww}$  values during the study period.  $R_e$ , effective  
 778 reproduction number; PPV, Positive Predictive Value; NPV, Negative Predictive Value.  
 779

780  
 781

782 **Table 6. Comparison of  $R_c$  temporality via cross correlations.**

| County        | $R_{cc}$                   | Lag (Days),<br>Instantaneous $R_{ww}$ | Lag (Days),<br>Cohort $R_{ww}$ | CC,<br>Instantaneous $R_{ww}$ | CC,<br>Cohort $R_{ww}$ |
|---------------|----------------------------|---------------------------------------|--------------------------------|-------------------------------|------------------------|
| Sacramento    | Sewershed-restricted cases | [-3, 4]                               | [-4, 3]                        | [0.65, 0.7]                   | [0.67, 0.72]           |
|               | CalCAT ensemble            | [-8, 2]                               | [-15, -4]                      | [0.72, 0.77]                  | [0.69, 0.73]           |
| San Francisco | Sewershed-restricted cases | [0, 8]                                | [0, 10]                        | [0.73, 0.77]                  | [0.76, 0.80]           |
|               | CalCAT ensemble            | [-4, 2]                               | [-11, 0]                       | [0.87, 0.92]                  | [0.84, 0.89]           |
| Santa Clara   | Sewershed-restricted cases | [-2, 3]                               | [-3, 4]                        | [0.84, 0.87]                  | [0.84, 0.89]           |
|               | CalCAT ensemble            | [-8, 1]                               | [-16, -6]                      | [0.84, 0.88]                  | [0.8, 0.84]            |
| Stanislaus    | Sewershed-restricted cases | [4, 10]                               | [-1, 7]                        | [0.72, 0.76]                  | [0.81, 0.85]           |
|               | CalCAT ensemble            | [-6, 2]                               | [-15, -6]                      | [0.73, 0.76]                  | [0.78, 0.83]           |
| Yolo          | Sewershed-restricted cases | [-2, 9]                               | [-2, 10]                       | [0.68, 0.73]                  | [0.68, 0.73]           |
|               | CalCAT ensemble            | [-5, 3]                               | [-9, 1]                        | [0.88, 0.93]                  | [0.84, 0.89]           |

783

784 Note: Using cross-correlation analysis with a maximum lag of 20 days, we investigated temporal alignment of  $R_{ww}$   
785 (cohort or instantaneous) and  $R_{cc}$ .  $R_{cc}$  included either the CalCAT ensemble – a publicly available ensemble of  
786 county-wide  $R_{cc}$  estimates – or county-aggregated, sewershed-restricted  $R_{cc}$  estimates. We report the range of time  
787 lags for cross-correlation coefficients within 0.05 of the maximum observed correlation value. We also include the  
788 range of cross-correlation coefficients within 0.05 of the maximum observed correlation value. Negative lag values  
789 indicate  $R_{ww}$  temporally precedes  $R_{cc}$ ; positive lag values indicate  $R_{cc}$  temporally precedes  $R_{ww}$ ; lag values of zero  
790 indicate no temporal shift of  $R_{ww}$  with respect to  $R_{cc}$ .  $R_{ww}$ , sewershed-restricted, wastewater-based effective  
791 reproduction number;  $R_{cc}$ , case-based effective reproduction number; CC, cross-correlation coefficient

792 **FIGURE CAPTIONS**

793

794 **Figure 1. Map of sewersheds included in analysis.**

795 The geographical boundaries of sewersheds (a wastewater treatment plant's catchment area) selected for the present  
796 study are highlighted in blue. Each sewershed's respective county is outlined in black. Three of the five studied  
797 counties (San Francisco, Santa Clara, and Yolo) are illustrated; maps of the remaining counties (Sacramento and  
798 Stanislaus) are included in the Supplemental Material.

799

800 **Figure 2. Stepwise process of county-aggregated, sewershed-restricted  $R_e$  estimation for a single location.**

801 Using San Francisco as an example, we demonstrate our stepwise pipeline for estimating county-aggregated,  
802 sewershed-restricted  $R_e$ . Each column represents a single wastewater treatment plant within the county. The left  
803 column corresponds to San Francisco Oceanside, which surveils 28% of the total county population; the right  
804 column corresponds to San Francisco Southeast, which surveils 84% of the total county population. Detailed axes  
805 are excluded for this generic, representation of the  $R_e$  estimation process. (A) The pipeline begins with raw,  
806 sewershed-restricted time series data; in our study, input data includes case counts (pink) and wastewater viral  
807 concentrations (blue). (B) In Step 1, raw time series data are transformed: case counts are LOESS smoothed, while  
808 wastewater concentrations are spline smoothed and root transformed. Transformed data are subsequently  
809 deconvolved, shifting both time series' backwards temporally such that observations are indexed by date of  
810 infection. (C) In Step 2, the methods of Cori et al.<sup>1</sup> and Wallinga and Teunis<sup>22</sup> are applied on the modified time  
811 series data streams to produce instantaneous and cohort sewershed-level  $R_e$  estimates. (D) Finally, in Step 4,  
812 sewershed-level  $R_e$  estimates are population-weighted and aggregated to yield county-level  $R_e$  estimates. Note: WW,  
813 wastewater surveillance data;  $R_e$ , effective reproduction number; Model,  $R_e$  modeling approach (instantaneous or  
814 cohort).

815

816 **Figure 3. Time series of county-aggregated, sewershed-restricted  $R_e$  for Santa Clara, San Francisco, and Yolo.**

817 Between May 1, 2022 and April 30, 2023, three county-level  $R_e$  time series are compared: (top, black) the CalCAT  
818 ensemble – a publicly available ensemble of county-wide  $R_{cc}$  estimates; (middle, pink) county-aggregated,  
819 sewershed-restricted  $R_{cc}$ ; and (bottom, blue)  $R_{ww}$ . Both  $R_{ww}$  and sewershed-restricted  $R_{cc}$  were calculated using the  $R_e$   
820 estimation pipeline piloted in this study. Solid pink or blue lines indicate instantaneous  $R_e$ , while dashed pink or blue  
821 lines indicate cohort  $R_e$ . 95% confidence intervals for each  $R_e$  type (instantaneous or cohort) are depicted. Results for  
822 three of five studied counties (San Francisco, Santa Clara, and Yolo) are included; results for the remaining counties  
823 (Sacramento and Stanislaus) are included in the Supplemental Material. Note:  $R_{ww}$ , sewershed-restricted,  
824 wastewater-based effective reproduction number;  $R_{cc}$ , case-based effective reproduction number.

825

826 **Figure 4. Frequency of agreement between  $R_{ww}$  and the CalCAT ensemble for Santa Clara, San Francisco  
827 and Yolo.**

828 Based on magnitude,  $R_e$  values were classified into transmission strength categories (<0.7-0.9, 0.9-1.1, 1.1-1.3, >1.3,  
829 which represent a strong decrease, decrease, stability, increase, and strong increase in  $R_e$ , respectively). Frequency of  
830 agreement between  $R_{ww}$  and the CalCAT ensemble (i.e., instances when predicted  $R_{ww}$  values and reference CalCAT  
831 ensemble values belong to the same  $R_e$  category) are visualized by the confusion matrix. The right column illustrates  
832 results for cohort  $R_{ww}$ , and the left for instantaneous  $R_{ww}$ . Each row represents a single county. The counter diagonals  
833 (top right to bottom left) of each matrix represents true positives. Off-diagonal values indicate instances of  
834 disagreement between  $R_{ww}$  model predictions and the CalCAT ensemble. Two  $R_e$  categories ( $R_e < 0.7$ ,  $R_e > 1.3$ ) with  
835 no  $R_e$  values during the study period were excluded. Results for three of five studied counties (San Francisco, Santa  
836 Clara, and Yolo) are included; results for the remaining counties (Sacramento and Stanislaus) are included in the  
837 Supplemental Material. Note:  $R_{ww}$ , sewershed-restricted, wastewater-based effective reproduction number;  
838 Instantaneous, instantaneous  $R_{ww}$ ; Cohort, cohort  $R_{ww}$ .

839



## Yolo

medRxiv preprint doi: <https://doi.org/10.1101/2024.05.02.24306456>; this version posted May 3, 2024. The copyright holder for this preprint (which was not certified by peer review) is the author/funder, who has granted medRxiv a license to display the preprint in perpetuity. It is made available under a [CC-BY-NC-ND 4.0 International license](https://creativecommons.org/licenses/by-nc-nd/4.0/).

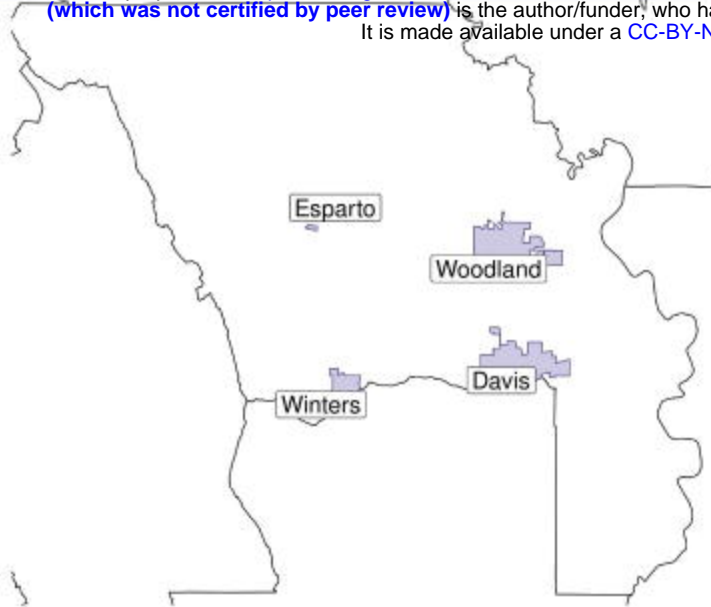

## Santa Clara

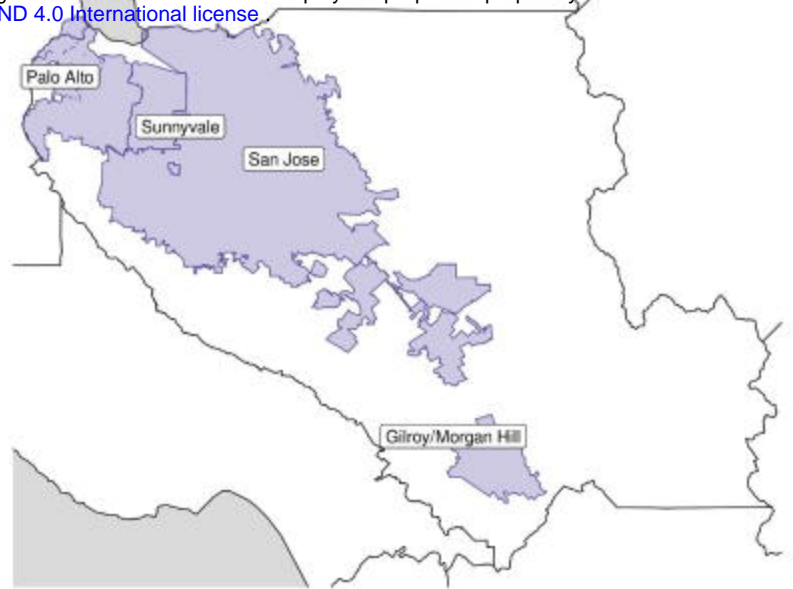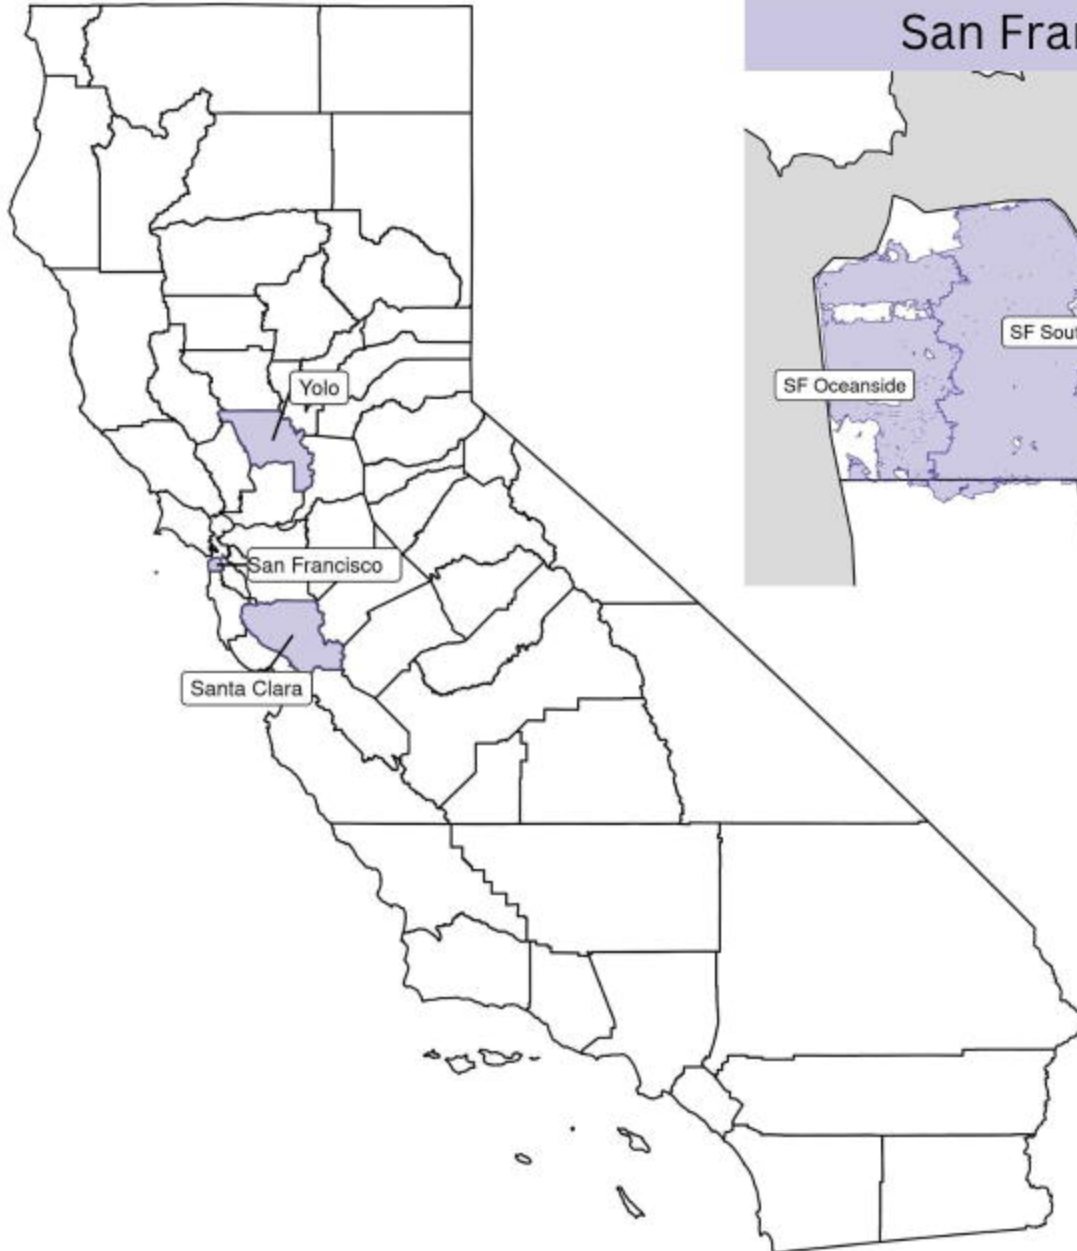

## San Francisco

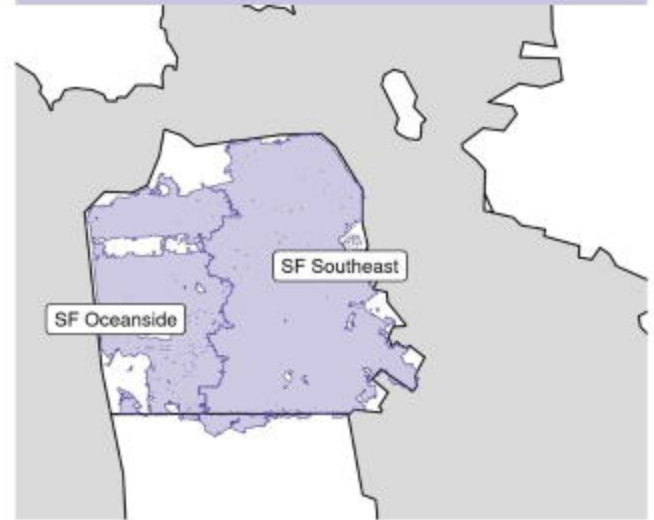

# San Francisco

Oceanside (28%)

Southeast (84%)

(A) STEP 0: Raw data (sewershed-level)

medRxiv preprint doi: <https://doi.org/10.1101/2024.05.02.24306456>; this version posted May 3, 2024. The copyright holder for this preprint (which was not certified by peer review) is the author/funder, who has granted medRxiv a license to display the preprint in perpetuity. It is made available under a [CC-BY-NC-ND 4.0 International license](#).

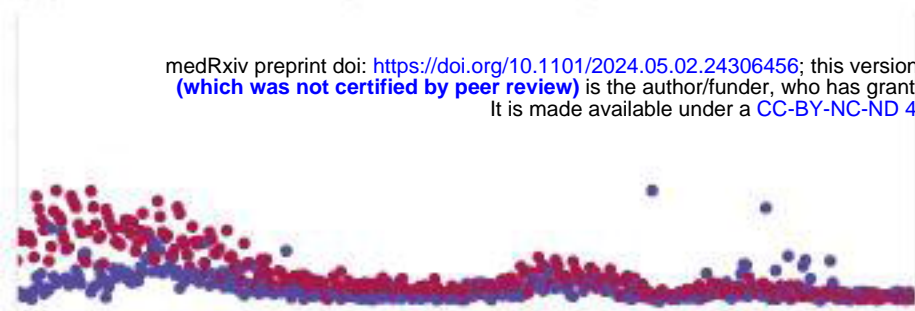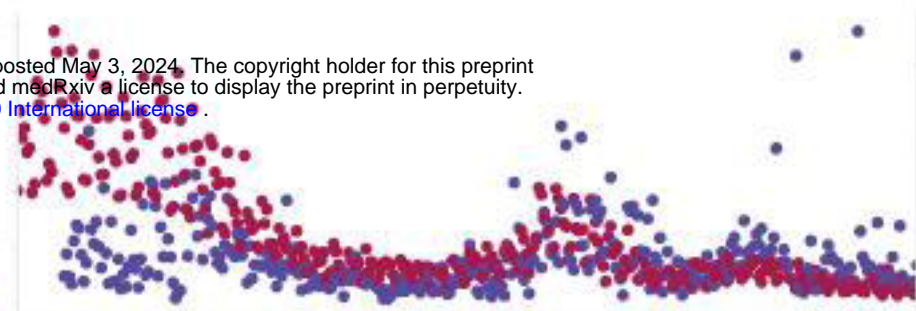

(B) STEP 1: Data transformation (sewershed-level)

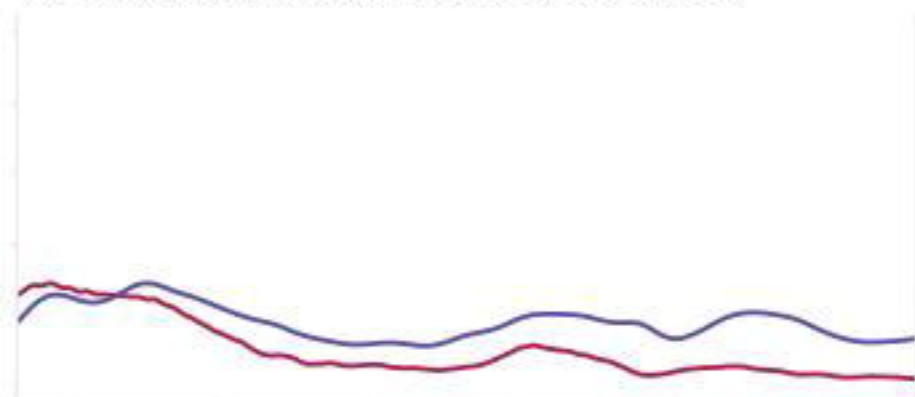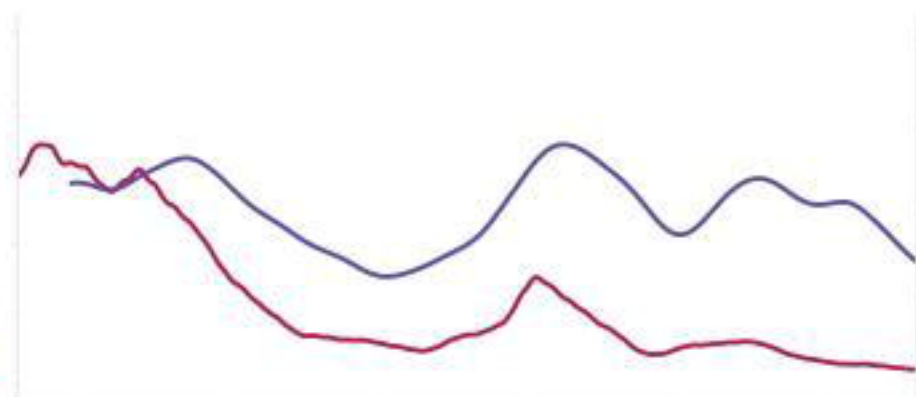

(C) STEP 2: Produce  $R_e$  (sewershed-level)

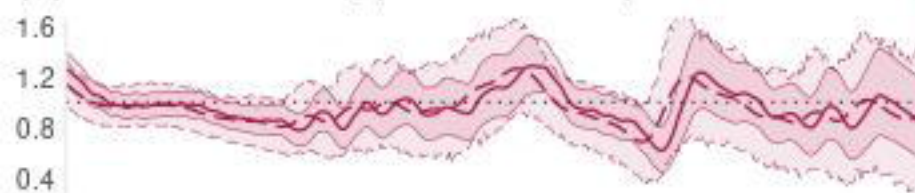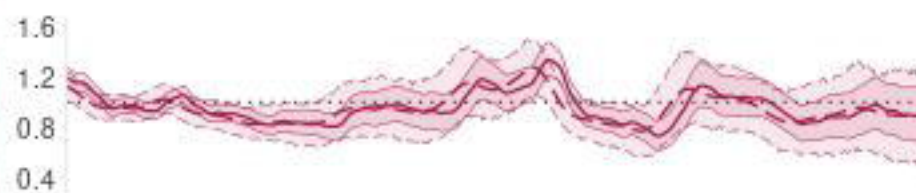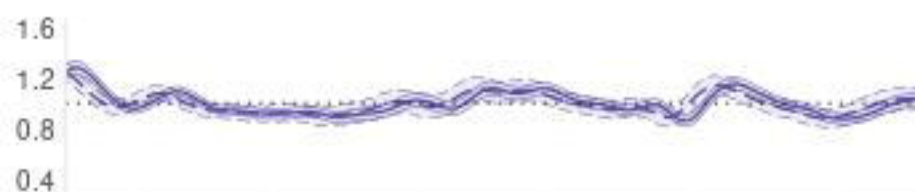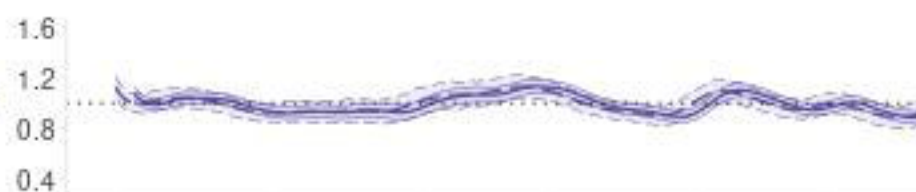

(D) STEP 3: Produce county-level  $R_e$  via population weighting

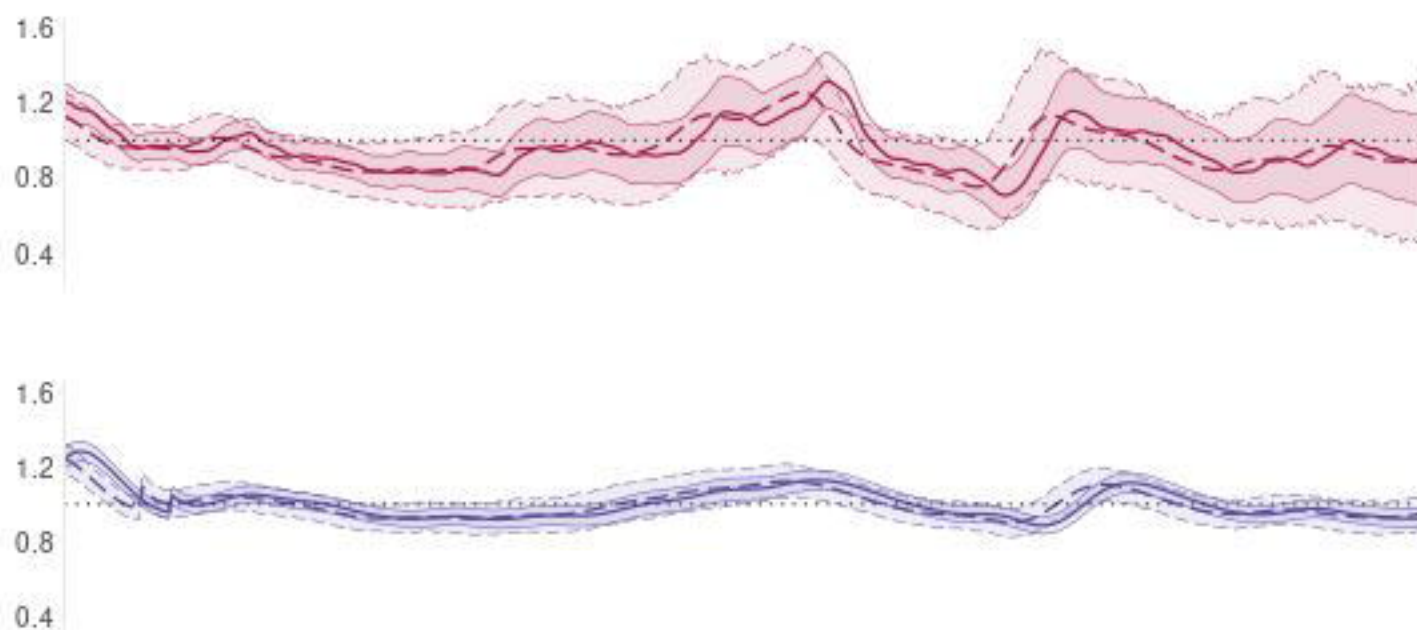

Data Type • Sewershed-restricted cases • WW  
Model — Instantaneous - - Cohort

### San Francisco

### Santa Clara

### Yolo

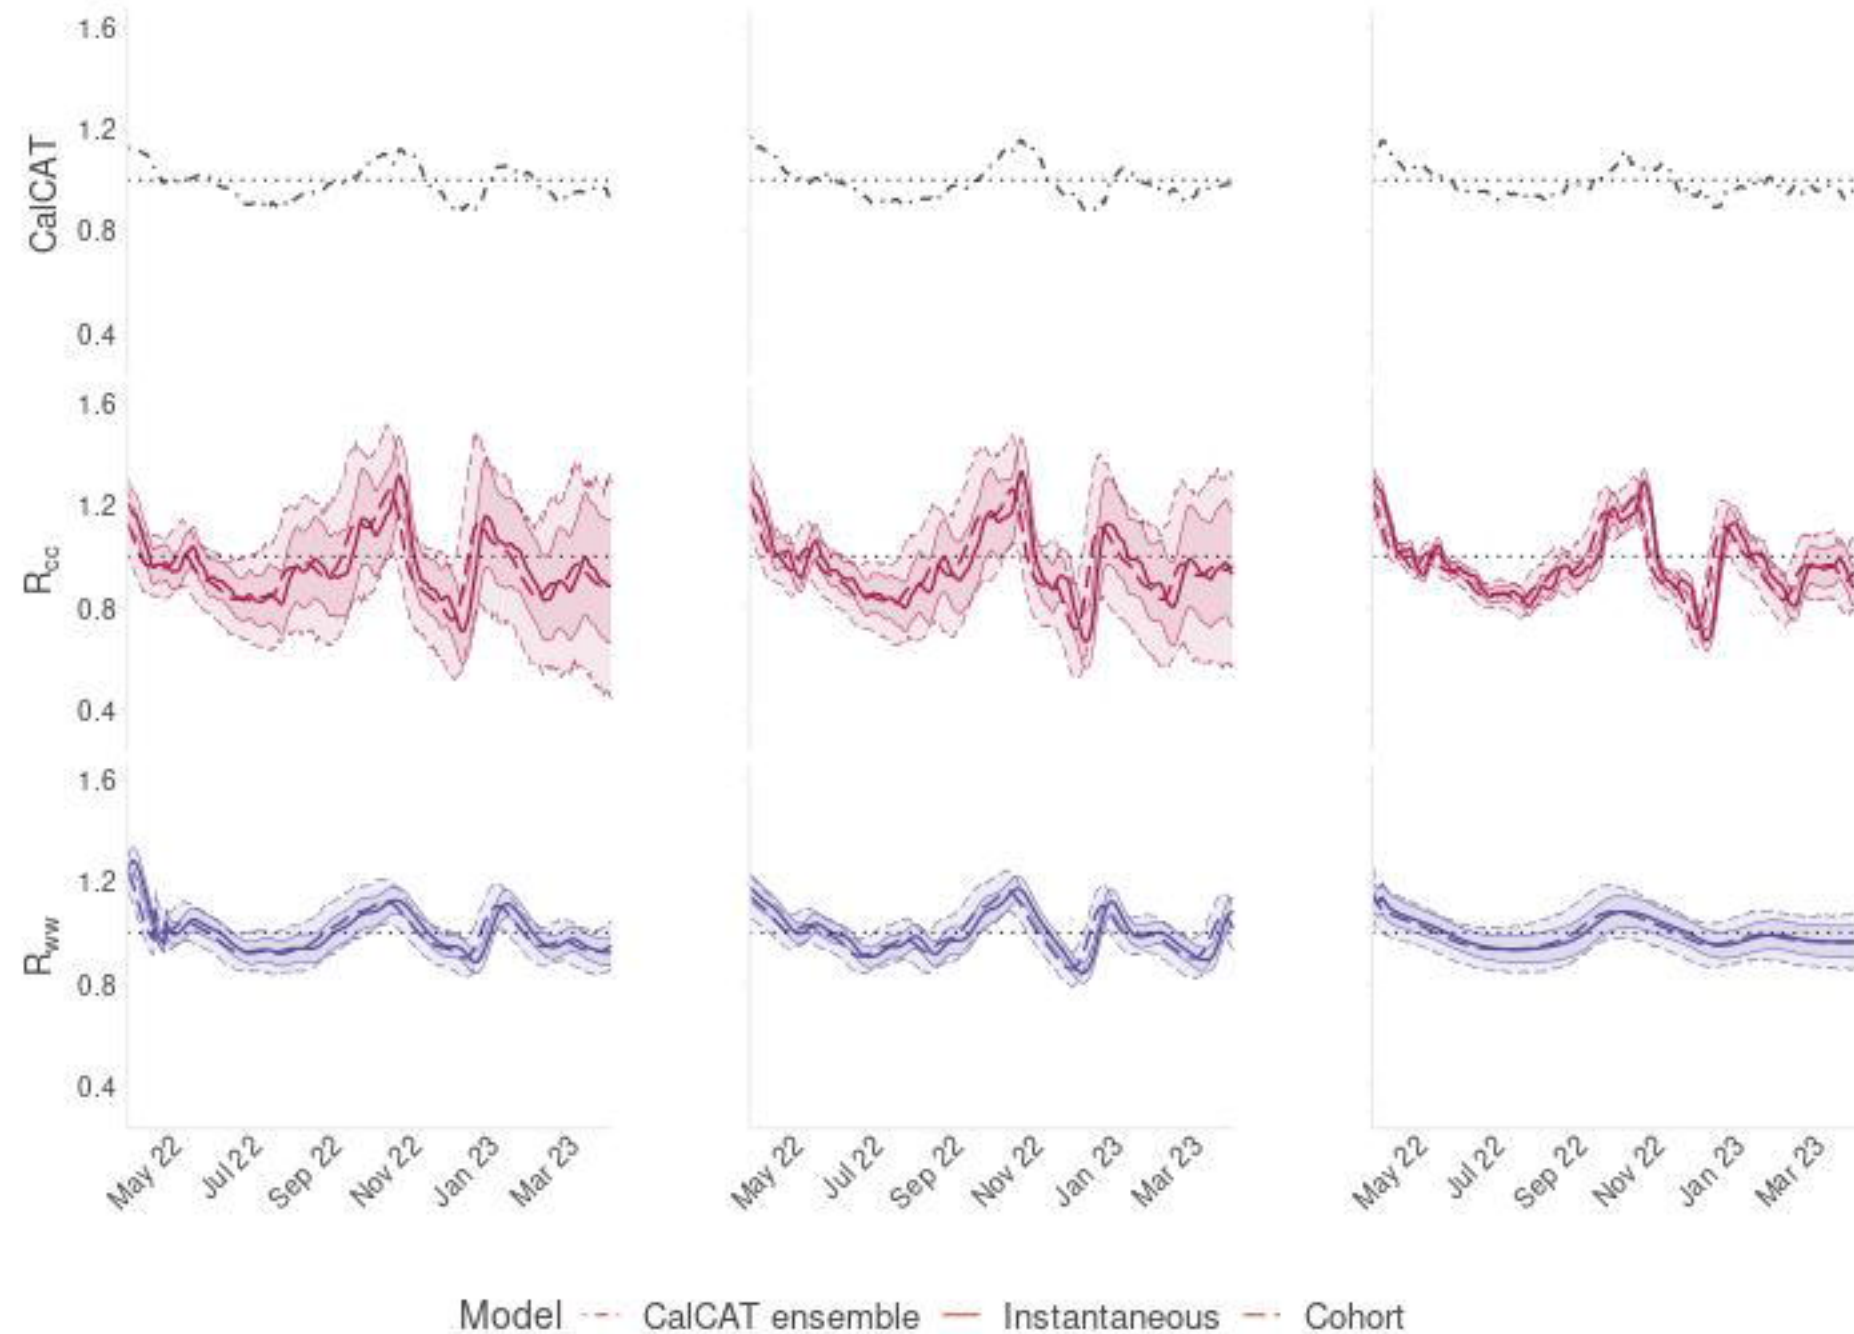

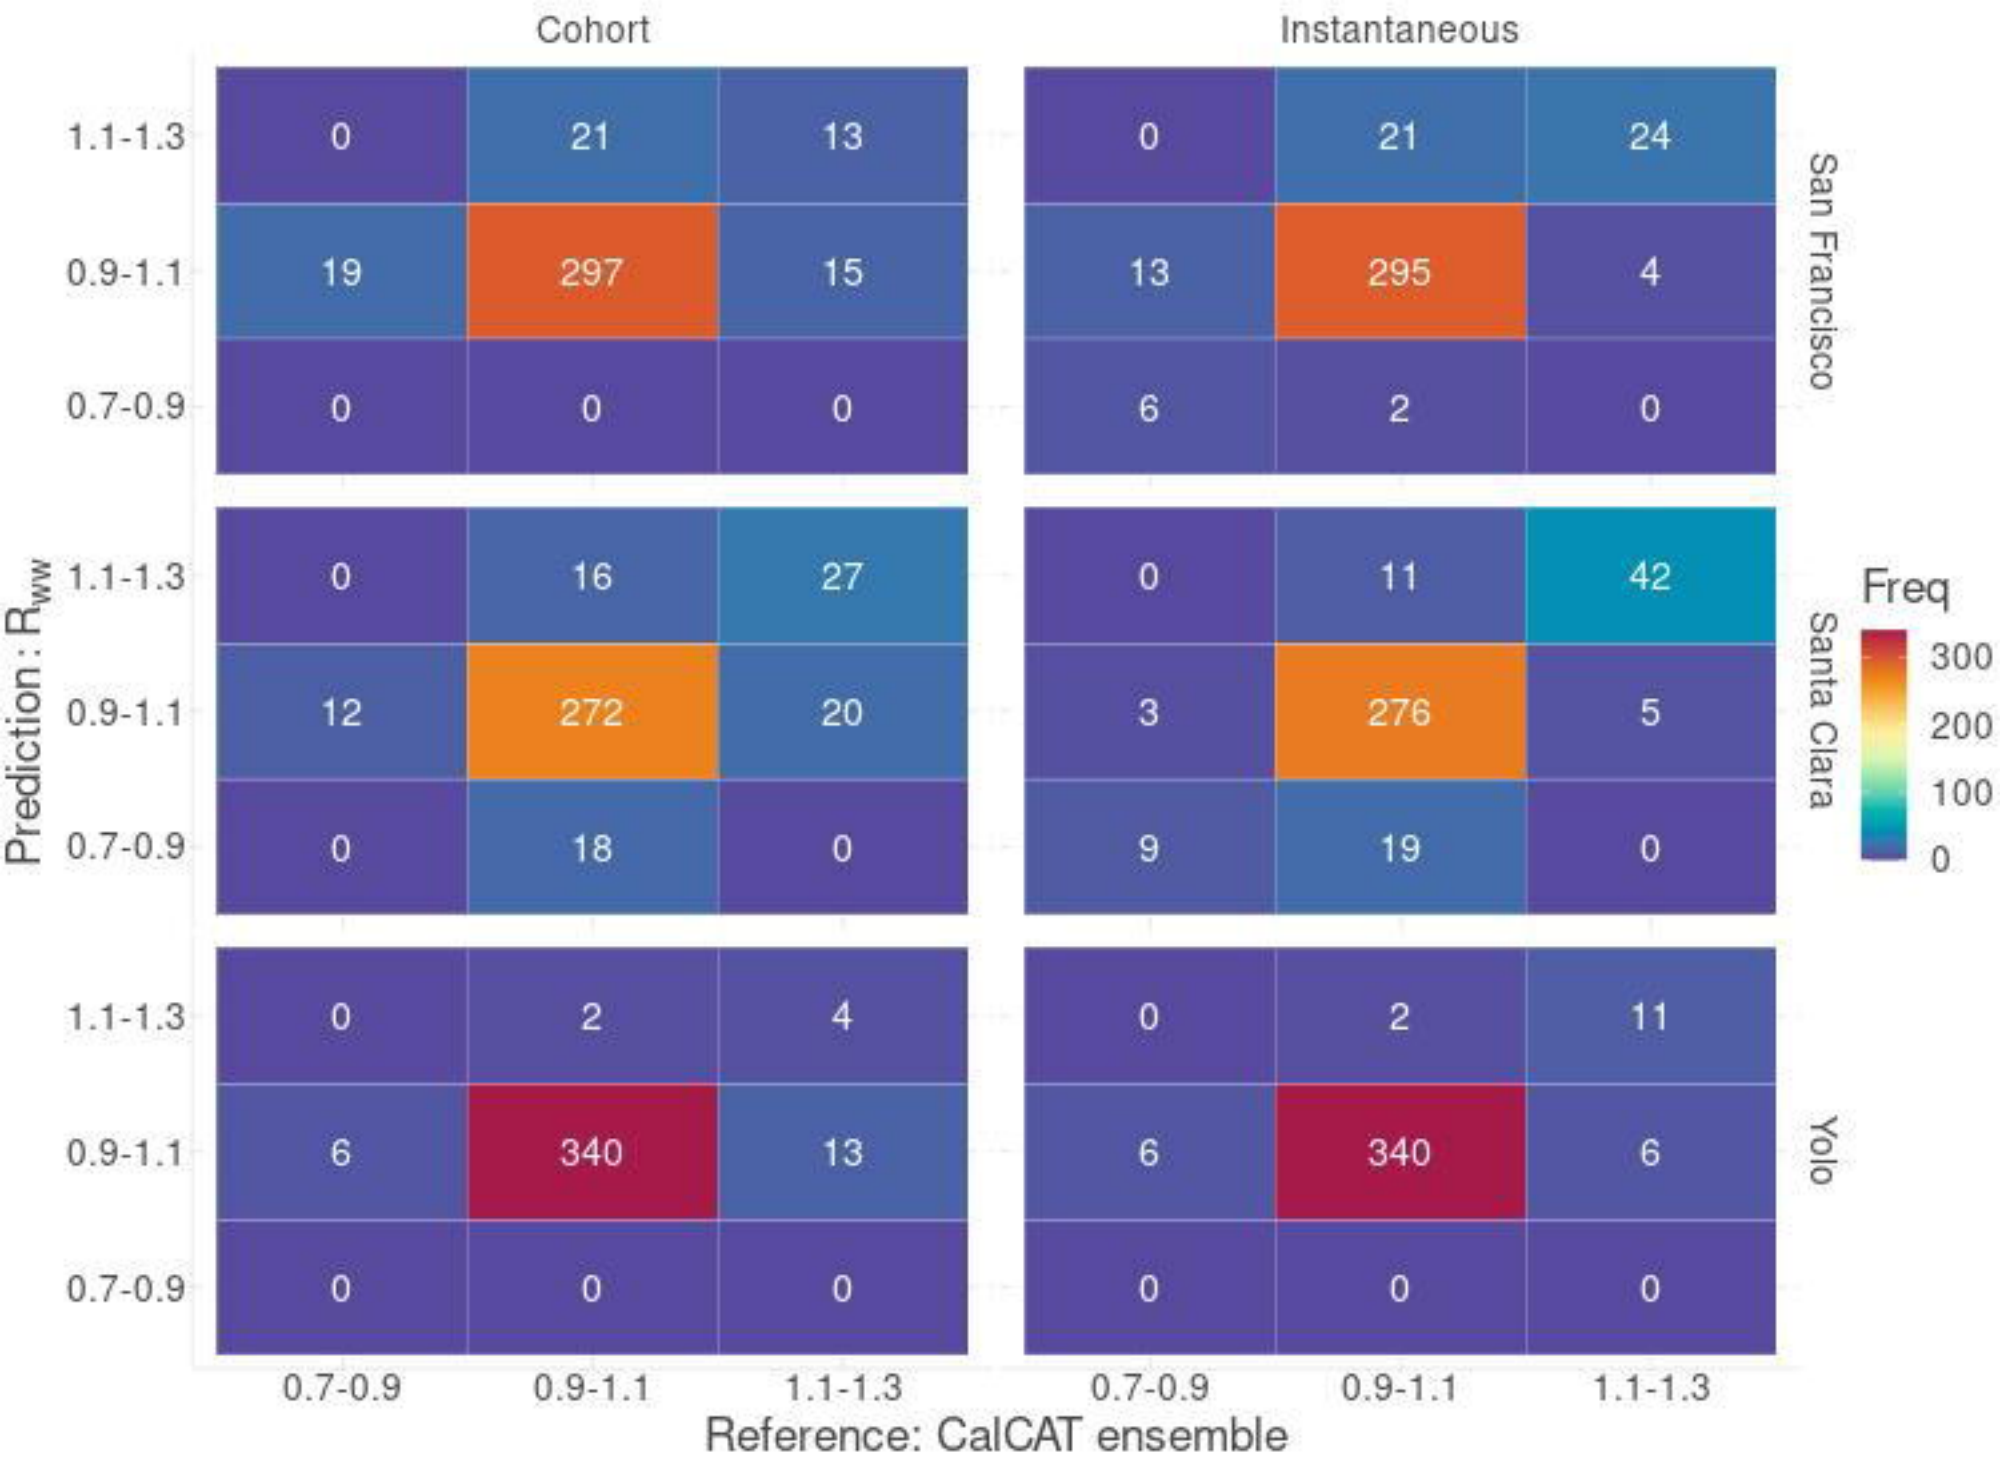

Source: https://www.medrxiv.org/content/10.1101/2024.05.02.24306456v1.full.pdf
